# 1 ***Cis-topic* modelling of single-cell epigenomes**

2

3 Carmen Bravo González-Blas<sup>1,2,†</sup>, Liesbeth Minnoye<sup>1,2,†</sup>, Dafni Papisokrati<sup>1,2</sup>, Sara Aibar<sup>1,2</sup>, Gert  
4 Hulselmans<sup>1,2</sup>, Valerie Christiaens<sup>1,2</sup>, Kristofer Davie<sup>1,2</sup>, Jasper Wouters<sup>1,2</sup>, and Stein Aerts<sup>1,2,\*</sup>

5

6 <sup>1</sup> VIB Center for Brain & Disease Research. Leuven, Belgium.

7 <sup>2</sup> KU Leuven, Department of Human Genetics KU Leuven. Leuven, Belgium.

8 <sup>†</sup> These authors contributed equally

9 <sup>\*</sup> Corresponding author: [stein.aerts@kuleuven.vib.be](mailto:stein.aerts@kuleuven.vib.be)

10

## 11 **Keywords**

12 Single-cell epigenomics, single cell ATAC-seq, gene regulation, topic modelling, Latent Dirichlet  
13 Allocation, cell state identification, trajectory reconstruction, enhancer logic.

## 14 **Abstract**

15 Single-cell epigenomics provides new opportunities to decipher genomic regulatory programs from  
16 heterogeneous samples and dynamic processes. We present a probabilistic framework called cisTopic,  
17 to simultaneously discover “cis-regulatory topics” and stable cell states from sparse single-cell  
18 epigenomics data. After benchmarking cisTopic on single-cell ATAC-seq data, single-cell DNA  
19 methylation data, and semi-simulated single-cell ChIP-seq data, we use cisTopic to predict regulatory  
20 programs in the human brain and validate these by aligning them with co-expression networks derived  
21 from single-cell RNA-seq data. Next, we performed a time-series single-cell ATAC-seq experiment  
22 after SOX10 perturbations in melanoma cultures, where cisTopic revealed dynamic regulatory topics  
23 driven by SOX10 and AP-1. Finally, machine learning and enhancer modelling approaches allowed to  
24 predict cell type specific SOX10 and SOX9 binding sites based on topic specific co-regulatory motifs.  
25 cisTopic is available as an R/Bioconductor package at <http://github.com/aertslab/cistopic>.

26

## 27 Introduction

28 Genomic regulatory programs are driven by combinations of transcription factors that bind to cis-  
29 regulatory control regions, such as enhancers and promoters, thereby regulating the transcription of  
30 target genes. Unravelling the regulatory programs of different cell states can provide mechanistic  
31 insights into how these programs are encoded in the DNA sequence, how they are affected during  
32 disease, and how they can ultimately be exploited to manipulate cell fate, for example for cellular  
33 reprogramming. Although single-cell transcriptomics allows an unbiased detection of cellular diversity,  
34 reverse engineering the genomic regulatory code from the transcriptome remains a challenge. On the  
35 other hand, single-cell epigenomic techniques, such as single-cell ATAC-seq (scATAC-seq)  
36 (Buenrostro et al., 2015; Cusanovich et al., 2015), single-cell CUT&RUN (Hainer et al., 2018), or  
37 single-cell DNA methylome sequencing (Farlik et al., 2015), provide a more direct prediction of the  
38 genome-wide activity of enhancers and promoters, at single-cell resolution. These approaches, in  
39 particular single-cell chromatin accessibility profiling using scATAC-seq, allow the discovery of  
40 multiple cell types and regulatory states from a heterogeneous mixture of cells, such as a whole  
41 organism (Cusanovich et al., 2018), a whole organ (Lake et al., 2017), or an asynchronous dynamic  
42 process like differentiation (Corces et al., 2016; Pliner et al., 2017). These studies have provided  
43 extensive new insight into the diversity of chromatin landscapes within a tissue.

44 In comparison to single-cell transcriptomics, the computational analysis of scATAC-seq data is more  
45 challenging. This is mostly due to scalability and the higher sparsity of the data: a scATAC-seq dataset  
46 may harbour combinations from more than 100,000 potential regulatory sites –which results in  
47 extremely large matrices when profiling tens of thousands of cells–, but only a small subset of regions  
48 are detected as accessible in each individual cell (i.e. on average, only 10,000-20,000 deduplicated reads  
49 are obtained per cell (Table S1)). The current methods to analyse scATAC-seq data can be divided in  
50 two classes (Table S2). The first class consists of unsupervised methods such as scABC or Latent  
51 Semantic Indexing (LSI); in which, after representing the data in a lower dimensional space, cells with  
52 similar epigenomes are clustered (Cusanovich et al., 2015, 2018; Zamanighomi et al., 2018). Reads are  
53 then aggregated across all cells in a cluster to generate a pseudo-bulk profile, which is then used to  
54 identify differentially accessible regions between the clusters. A second class of methods consists of  
55 supervised methods that *a priori* aggregate all reads in a cell over pre-defined sets of genomic regions,  
56 called “*cistromes*” (e.g., ChIP-seq peaks of a transcription factor, or regions sharing a particular  
57 transcription factor motif or k-mer), such as chromVAR (Schep et al., 2017) and other, not yet peer-  
58 reviewed methods, such as BROCKMAN (de Boer and Regev, 2017) and SCRAT (Ji et al., 2017).  
59 Although this approach is effective to reduce the sparseness, it relies on pre-defined cistromes, which  
60 hinders the discovery of new regulatory programs. In addition, methods of both classes are optimised  
61 towards cell clustering, but do not provide a co-optimised grouping of regulatory regions.

62 Here, we develop cisTopic, an unsupervised Bayesian framework based on topic modelling, that allows  
63 simultaneous grouping of co-accessible regions into regulatory topics and clustering of cells based on  
64 their regulatory topic contributions. These “cis-regulatory topics” can be directly exploited for motif  
65 discovery to predict combinations of transcription factors, but also to explore dynamic changes in  
66 chromatin state. We benchmarked cisTopic using simulated data and concluded that this approach  
67 outperforms previously published methods in terms of accuracy, robustness and interpretability. We  
68 validated cisTopic by applying it to a previously published data set of 30,000 cells from the human  
69 brain (Lake et al., 2017), finding subpopulations in an unsupervised manner and in agreement with gene  
70 regulatory programs derived from single-cell transcriptomics data. In addition, we generate new  
71 scATAC-seq data and reveal dynamic changes in chromatin accessibility during melanoma phenotype  
72 switching *in vitro*, driven by the loss of SOX10. Finally, by comparing the SOX10 topics in melanoma  
73 with SOX9 and SOX10 topics in the brain, we propose a cooperative pioneering model for the SOXE  
74 (i.e. SOX8, SOX9 and SOX10) family members.

## 75 **Results**

### 76 **Probabilistic topic modelling identifies cell states and reveals regulatory programs at** 77 **single-cell resolution**

78 We have developed cisTopic, a new method for the analysis of single-cell epigenomics data that allows  
79 the simultaneous identification of cell states and co-regulatory regions in an unsupervised manner (Fig.  
80 1). The input for cisTopic is a binary accessibility matrix, with cells (i.e. objects) as columns and  
81 regulatory regions (i.e. features) as rows (in the case of single-cell methylation data, binary methylation  
82 scores) (Fig. 1a). Since this matrix is very sparse, we reasoned that Latent Dirichlet Allocation (LDA)  
83 (Blei et al., 2003), a robust Bayesian topic modelling method used to group objects addressing similar  
84 topics or themes, as well as grouping co-occurrent features into topics, could be applied to single-cell  
85 epigenomics data. Importantly, while existing methods rely on *hard clustering* (i.e., a feature or object  
86 will be uniquely assigned to one group), topic modelling assigns features to a group or topic with a  
87 certain probability, which means that the same feature can contribute to different groups, although with  
88 different strengths. In other words, compared to the discrete approach taken by clustering methods, the  
89 fuzzy clustering performed by topic models allows a feature (e.g. a regulatory region) to contribute to  
90 several groups or topics, and an object (e.g. a single cell) to be composed by different topics with  
91 different weights; resulting in less information loss.

92 Importantly, LDA has a series of assumptions that are fulfilled in single-cell epigenomics data, such as  
93 non-ordered features (i.e. the order of regulatory regions is not relevant) and the allowance of  
94 overlapping topics (i.e. a regulatory region can be co-accessible with different other regions depending  
95 on the context; meaning that a region can participate in different regulatory programs depending on the  
96 cell type or state). In addition, compared to other topic modelling methods such as probabilistic LSI,  
97 LDA offers a probabilistic structure at the level of the objects by introducing Dirichlet priors over the  
98 topic contributions within the objects and does not lead to overfitting when increasing the size of the  
99 data set (Blei et al., 2003).

100 Several approaches have been proposed to estimate the probability distributions, such as maximising  
101 the probability of the features by estimating the feature-topic distributions using Expectation  
102 Maximization (which is slow and may converge to a local maxima) or Gibbs Sampling (Bishop, 2006;  
103 Blei et al., 2003). To maximise the performance of LDA, cisTopic uses a collapsed Gibbs Sampler  
104 (Griffiths and Steyvers, 2004), which allows to reduce the complexity of the model by only sampling  
105 the topic assignment of each feature per object without the need of sampling from the feature-topic and  
106 the topic-object distributions, reducing the exploration space. The probability of sampling from a  
107 specific topic is proportional to the contribution of that topic to the object and the contribution of that

108 feature to the topic throughout the data set. These assignments are recorded through several iterations  
109 (after burn-in), and they can be used to estimate the feature-topic and the topic-object distributions.

110 Thus, we consider the accessible regulatory regions as features and cells as objects, and our aim is to  
111 simultaneously group regions that are co-accessible in topics and cluster cells based on the topic  
112 distribution of their accessible regions. By using LDA, two distributions are obtained, which correspond  
113 to (1) the probability of a region belonging to a cis-regulatory topic (region-topic distribution) and (2)  
114 the contributions of a topic within each cell (topic-cell distribution) (Fig. 1b). cisTopic includes  
115 functionalities for the biological interpretation of these distributions e.g. topic-cell distributions can be  
116 used to cluster cells and identify cell types (Fig. 1c); while region-topic distributions can be exploited  
117 to analyse the regulatory meaning of each topic (Fig. 1d). cisTopic is made available as a new  
118 R/Bioconductor package at <http://github.com/aertslab/cistopic>.

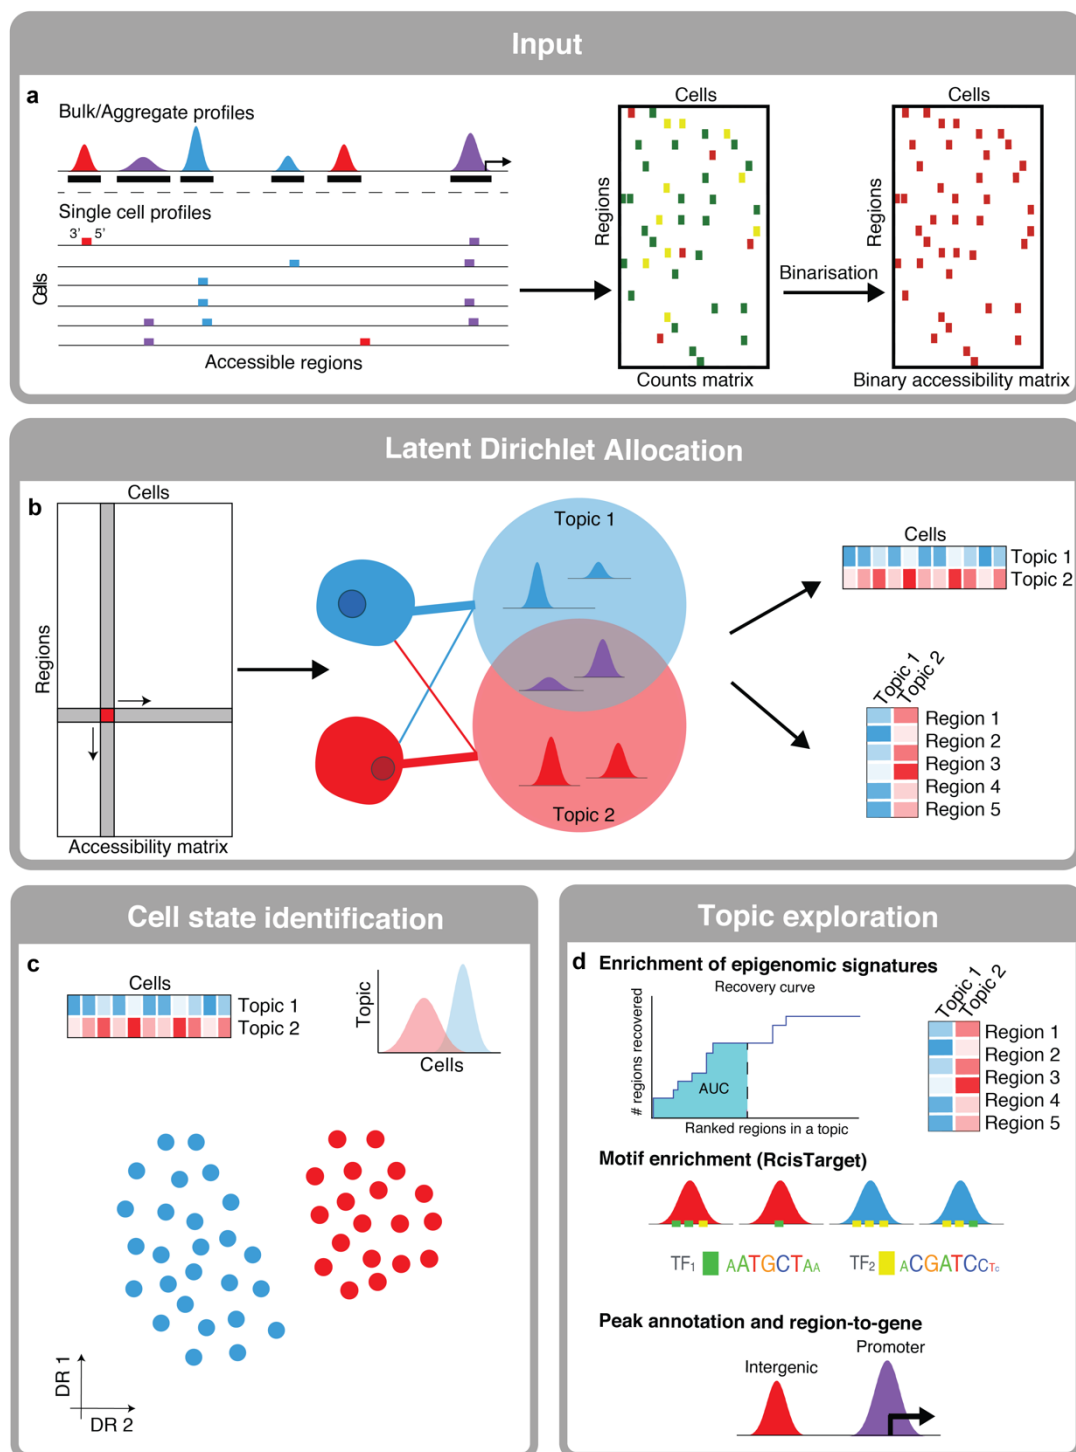

119

120 **Figure 1. cisTopic workflow.** **a.** The input for cisTopic is a binary accessibility matrix. This matrix can be formed  
 121 from single-cell BAM files and a set of genome-wide regulatory regions (e.g., from peak calling on the bulk or  
 122 aggregate data). **b.** Latent Dirichlet Allocation (LDA), using a collapsed Gibbs Sampler, is applied on the binary  
 123 accessibility matrix to obtain the topic-cell distributions (contributions of each topic per cell) and the region-topic  
 124 distributions (contributions of each region to a topic). Note that a region can contribute to more than one topic  
 125 (represented by the purple peaks). **c.** The topic-cell distributions are used for dimensionality reduction (e.g. PCA,

126 tSNE, diffusion maps) and clustering to identify cell states. **d.** The region-topic distributions can be used to predict  
127 the regulatory code underlying the topic. For example, topics can be compared with known epigenomic signatures  
128 using a recovery curve approach; regions can be annotated and linked to genes; and, after topic binarisation,  
129 enriched motifs can be identified via RcisTarget.

130 To benchmark cisTopic against the three published methods that are commonly used for scATAC-seq  
131 data analysis, namely Latent Semantic Indexing (LSI) (Cusanovich et al., 2015, 2018), chromVAR  
132 (Buenrostro et al., 2018; Johnson et al., 2018; Lareau et al., 2018; Liu et al., 2018; Mezger et al., 2018;  
133 Schep et al., 2017), and scABC (Zamanighomi et al., 2018); we simulated single-cell epigenomes from  
134 bulk H3K27Ac ChIP-seq profiles of 14 melanoma cell lines (Verfaillie et al., 2015). Eleven of these  
135 cell lines were published previously (GSE60666); while three additional profiles were generated in this  
136 study. To test the robustness of cisTopic towards sparsity, we ran several simulations varying the  
137 coverage per cell: from a range of 30,000-60,000 deduplicated reads per cell, down to 3,000-6,000  
138 deduplicated reads per cell, similar to scATAC-seq coverage ranges found in literature (Table S1) (Fig.  
139 2a; see *Methods*). We found that cisTopic is the most robust and accurate method to cluster cells (with  
140 an adjusted rand index (ARI) above 0.96, even at low read coverage), followed by scABC, LSI and  
141 chromVAR, respectively (Fig. 2b). Importantly, while previously existing methods only predict cell  
142 clusters, cisTopic simultaneously predicts regulatory regions that are important for each topic (i.e. other  
143 methods rely on *a posteriori* differential analysis of regions using the aggregated data per cluster (e.g.  
144 LSI and scABC, respectively) or start from *a priori* defined cistromes (e.g. chromVAR). On the  
145 melanoma H3K27Ac data, cisTopic reveals 2 general and 14 cell line specific topics (one for each cell  
146 line), as well as 2 topics that are shared across a subset of samples (Fig. 2c). One of these shared topics  
147 corresponds to the major melanoma cell line subtypes, namely the melanocyte-like, while the remaining  
148 corresponds to the mesenchymal-like subtypes (Hoek et al., 2006; Verfaillie et al., 2015). The genomic  
149 regions in these topics are enriched for AP-1 and TEAD motifs in the mesenchymal-like topic and SOX  
150 and E-box motifs in the melanocyte-like regions (Fig 2d), in agreement with earlier findings (Verfaillie  
151 et al., 2015). Furthermore, all the predicted topics from the simulated single-cell H3K27Ac ChIP-seq  
152 data can be confirmed by the corresponding bulk data (Fig. S1a,b). As expected, the general topics  
153 (accessible across all cell lines) are enriched for promoters; and the “low contribution topics” are formed  
154 mostly by “lowly accessible” regions and can be filtered out *a posteriori* (Fig S1c; Fig 2d). Next, we  
155 examined the capacity of all the tested methods to find rare subpopulations by reducing the number of  
156 cells for three of the cell lines by a 10-fold; and found that cisTopic also outperforms other methods in  
157 this aspect (Fig. S2). Finally, using previously published data sets of the hematopoietic system (Corces  
158 et al., 2016; Farlik et al., 2016), we confirmed that cisTopic also works on single-cell DNA methylation  
159 data and for trajectory analysis during differentiation (Fig S3, Fig S4).

160 In conclusion, cisTopic not only defines cell states more accurately than existing methods, but also  
161 discovers meaningful regulatory topics that yield insight into cell-type specific regulatory programs.

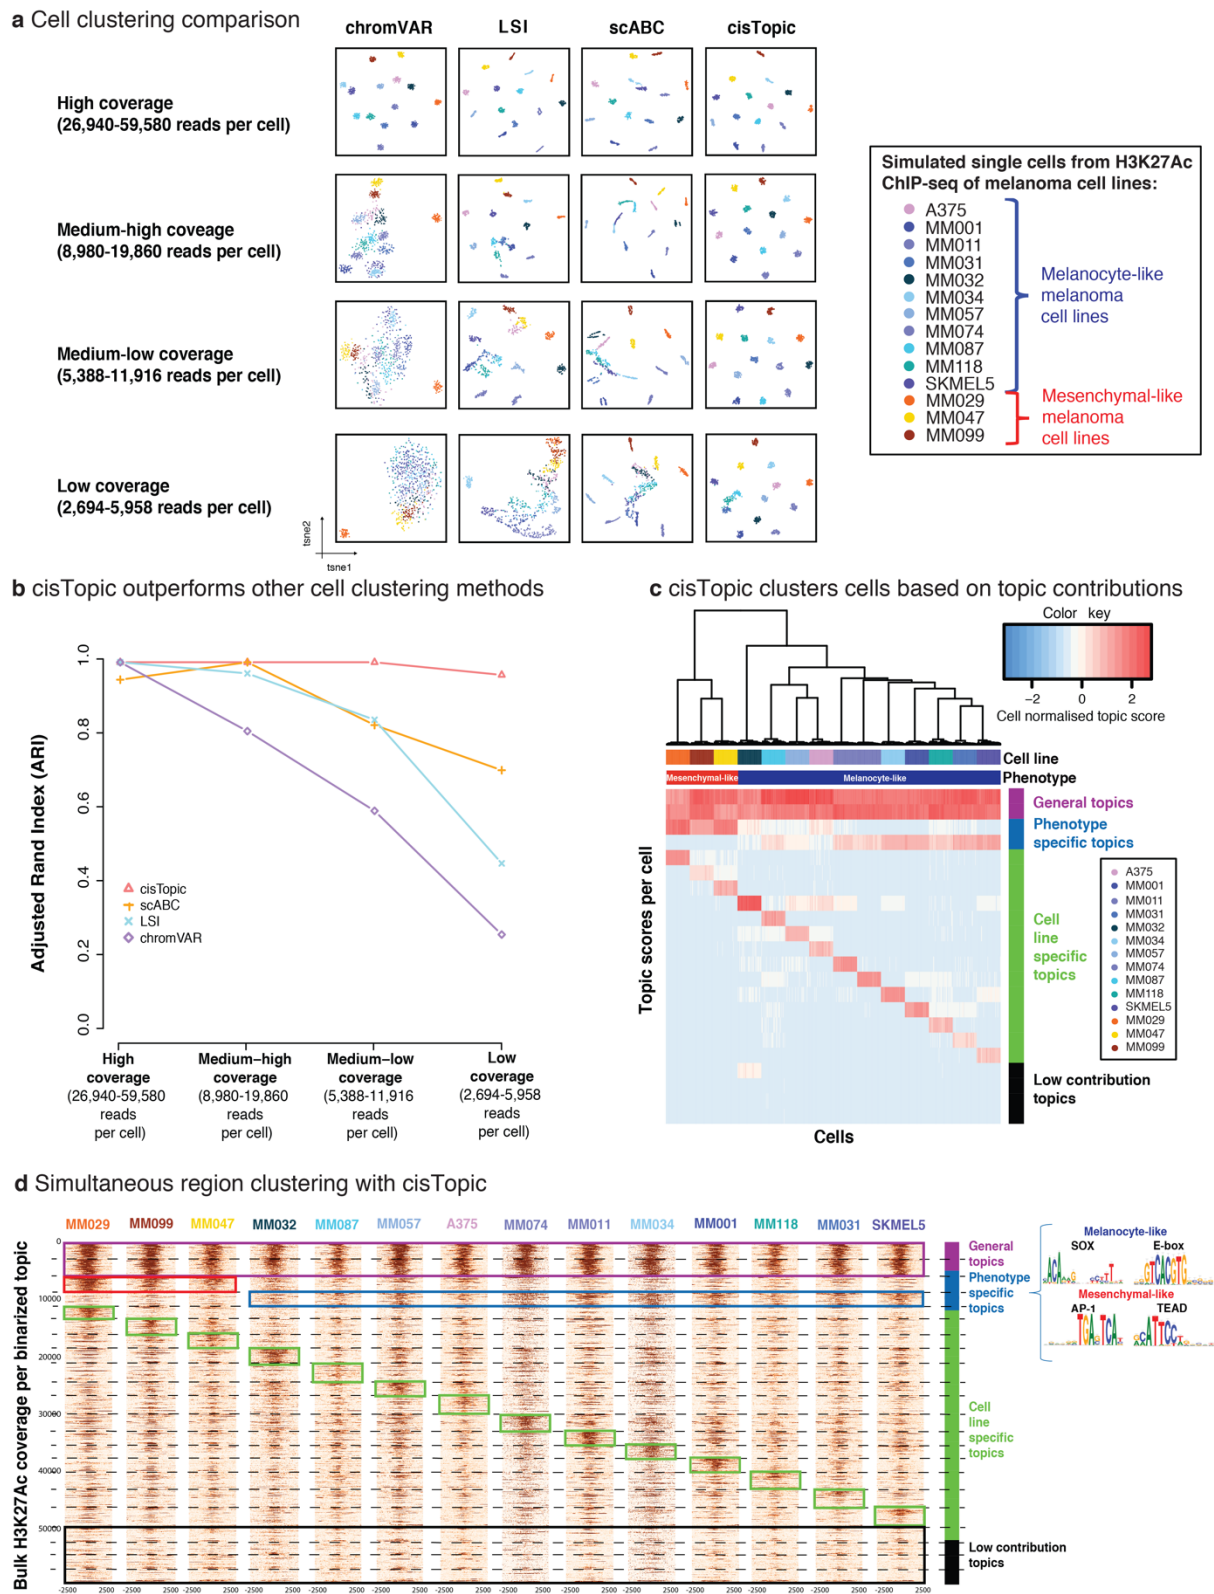

162

163

164

165

166

167

**Figure 2. cisTopic outperforms other cell clustering methods, namely chromVAR, LSI and scABC; while simultaneously clustering regions into regulatory topics. a.** Method comparison using semi-simulated single-cell H3K27Ac ChIP-seq data sampled from 14 bulk melanoma epigenomes with varying coverages. The tSNEs, coloured by cell line, were made using the cistrome enrichment matrix from chromVAR, the LSI matrix, the cell-to-landmark correlation matrix from scABC and the topic contributions per cell obtained with cisTopic. **b.** ARI



168 for each method (chromVar, LSI, scABC and cisTopic) at each coverage, using the bulk epigenome of origin as  
169 ground truth and cluster assignments based on hierarchical clustering from the cistrome enrichment matrix  
170 (chromVAR), the LSI matrix, the cell-to-landmark correlation matrix (scABC) and the topic contributions per cell  
171 (cisTopic). cisTopic is the most robust method, even at low coverage. **c.** cisTopic clusters cells based on their  
172 topic contributions. Based on their distributions over the different cell populations, we found general, phenotype  
173 specific, cell line specific and low contributing topics. **d.** Coverage heatmaps of bulk H3K27Ac data to validate  
174 the predicted regions per topic (see *Methods*). Each binarised topic is represented between the dashed horizontal  
175 lines, and within each topic, the regions are ordered by descending topic score. Topic regions show the expected  
176 patterns in the bulk data (expected patterns are surrounded by squares). Key motifs found enriched in the  
177 phenotype specific regions by RcisTarget are shown (right).

### 178 **cisTopic identifies robust cell types and gene regulatory networks in the human brain**

179 Next, we applied cisTopic to a large and biologically complex scTHS-seq data set (obtained by single-  
180 cell Tn5 Hypersensitivity Sequencing, similar to scATAC-seq) with 34,520 single cells from the human  
181 brain (Lake et al., 2017). This data set contains cells from the cerebellum, frontal cortex and visual  
182 cortex from three patients; with a total of 287,381 accessible regulatory regions. Based on the log-  
183 likelihood in the last iteration of the models, we selected the optimal number of regulatory topics to be  
184 23 (see *Methods*; Fig. S5). Using the topic-cell distributions, we were able to cluster the cells according  
185 to the major brain cell types: excitatory neurons (Ex), inhibitory neurons (In), cerebellar granule (Gran)  
186 cells, endothelial cells (End), astrocytes (Ast), oligodendrocytes (Oli), oligodendrocyte precursor cells  
187 (OPCs) and microglia (Mic) (Fig. 3a; Fig. S6a-e). After selecting the representative regions per topic  
188 by fitting a gamma distribution on the region-topic distributions (see *Methods*), we used RcisTarget  
189 (Aibar et al., 2017) to predict enriched motifs in each topic. For example, SOX and NFIA/B motifs are  
190 enriched in enhancers that are specifically accessible in astrocytes; SOX and OLIG motifs in the  
191 oligodendrocyte regulatory topic and NEUROD in the granule cell specific topic (Fig. S7). SOX9 and  
192 NFIA are known as key transcription factors during astrocyte development and maintenance, and their  
193 combined over-expression is sufficient to trans-differentiate fibroblasts into astrocytes (Caiazzo et al.,  
194 2015; Kang et al., 2012; Sun et al., 2017; Wilczynska et al., 2009). SOX10, OLIG1 and OLIG2 are  
195 master regulators of oligodendrocyte development (Wegner and Stolt, 2005; Yu et al., 2013; Zhou and  
196 Anderson, 2002), and NEUROD1/2 is a marker of granule cell differentiation (Miyata et al., 1999). In  
197 fact, several regions in the vicinity of the *NEUROD1* gene are highly accessible in the cerebellum,  
198 where granule cells reside, as compared to the visual and the frontal cortex (Fig. S8). Finally, the  
199 predicted regulatory topics could be further validated by GO enrichment using GREAT (McLean et al.,  
200 2010)), finding "myelination" (GO:0042552, p-value:  $10^{-23}$ ) for the oligodendrocytes topic, "glial cell  
201 fate commitment" (GO:0010001, p-value:  $10^{-7}$ ) for the astrocytes, and "regulation of sensory perception  
202 of pain" (GO:0051930, p-value:  $10^{-8}$ ) for the granule cells. Indeed, cerebellar granule cells are involved  
203 in sensory cognition (Bing et al., 2015).

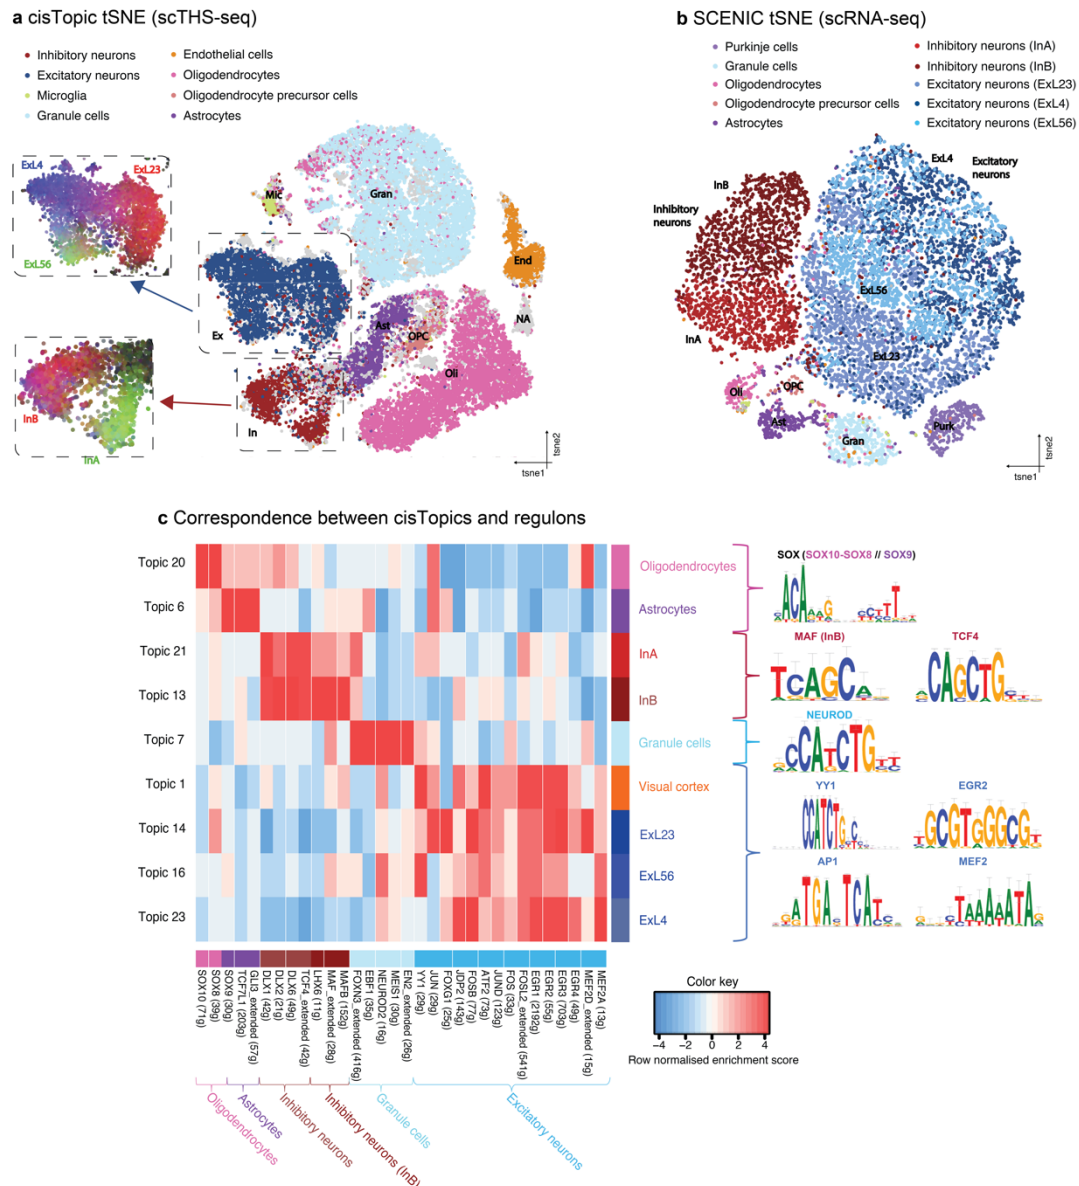

204

205 **Figure 3. cisTopic reveals major cell types and subpopulations in the human brain and summarises**  
 206 **regulatory programs underlying the transcriptome. a.** cisTopic tSNE based on topic-cell contributions from  
 207 the analysis of the scTHS-seq data. cisTopic identifies the main cell types but also subpopulations in interneurons  
 208 (InA and InB) and excitatory neurons (ExL23, ExL4 and ExL56). Contributions of the subpopulation specific  
 209 topics are represented by RGB encoding. **b.** tSNE based on regulon enrichment obtained using SCENIC (Aibar et  
 210 al., 2017) on the scRNA-seq data from the same tissue. **c.** Correspondence between cisTopic topics and SCENIC  
 211 regulons. The motifs shown are found in both the matching regulon and the topic.

212 Interestingly, cisTopic also revealed heterogeneity within the interneurons, with two distinct subtypes  
 213 (InA and InB), from which one (InB) is enriched for MAF motifs (Fig. S7). In the MAF-enriched topic,  
 214 targets such as ARX, LHX6, SOX6 and DLX1 are found; which, together with MAF and MAFB are  
 215 markers for the Medial Ganglionic Eminence derived interneurons (Chen et al., 2017; Lake et al., 2016).  
 216 In the second interneuron topic (InA population) PCP4, ISL1, SP8 and VIP are found, which are

217 markers for the Caudal/Lateral Ganglionic Eminence derived interneurons (Chen et al., 2017; Lake et  
218 al., 2016). Also, based on the cisTopic analysis, three subtypes of excitatory neurons can be  
219 distinguished (Fig. 3a, Fig. S7). These represent different neuronal layer positions within the cortex,  
220 namely layers II and III (ExL23), IV (ExL4) and V and VI (ExL56). These subpopulations had been  
221 already reported by Lake *et al.* based on scRNA-seq data (2017); however, cisTopic is able to  
222 distinguish them directly from scATAC-seq data, without the need of other data (Fig. S6f,g).

223 To further validate the predicted regulatory topics, we explored the relationship between cell type  
224 specific regulatory regions and cell type specific gene expression. To do so, we used the matching  
225 scRNA-seq data generated by Lake et al. (2017) on the same human brain tissues (15,884 cells). We  
226 run SCENIC to infer gene regulatory networks and cluster cell types from this data, predicting 250  
227 “regulons”, whereby each regulon consists of a transcription factor and its predicted target genes based  
228 on co-expression and motif enrichment (Aibar et al., 2017). Cell clustering using these 250 regulons  
229 identified the major cell types of interneurons and excitatory subpopulations at the same resolution as  
230 cisTopic (Fig. 3b). By comparing the cell type specific scRNA-seq regulons with the scATAC-seq  
231 topics (see *Methods*), we found a strong agreement for a range of transcription factors. For example,  
232 SOX8 and SOX10 regulons match the oligodendrocyte topic; and the SOX9 and GLI3 regulons that  
233 correspond with the astrocyte topic. Likewise, the DLX regulons match with the interneurons topics;  
234 and specifically, LHX6, MAF and MAFB regulons correspond with InB interneuron topic; NEUROD2  
235 regulons match with cerebellar topics; and AP-1, EGR and MEF2 regulons with excitatory neuron  
236 topics (Fig. 3c; Fig. S9). Importantly, the predicted transcription factors controlling the cis-regulatory  
237 topics (based on motif enrichment) and the corresponding expression-based regulons show strong  
238 agreement with literature (Chen et al., 2017; Flavell et al., 2008; Gashler and Sukhatme, 1995;  
239 Kaczmarek, 2002; Lake et al., 2016; Miyata et al., 1999; O’Donovan and Baraban, 1999; Petrova et al.,  
240 2013; Sun et al., 2017; Turnescu et al., 2018).

241 In conclusion, cisTopic reveals with high sensitivity cell states in large and heterogeneous data sets  
242 such as the human brain. Furthermore, the defined regulatory topics represent biologically relevant gene  
243 regulatory networks as demonstrated by the enrichment of motifs related TFs important in the defined  
244 cell types and correspondence between single-cell epigenomes and single-cell transcriptomes.

### 245 **cisTopic maps a dynamic regulatory landscape downstream of SOX10 in melanoma**

246 Next, we applied cisTopic to investigate dynamic changes in chromatin accessibility during a cell state  
247 transition in melanoma cells. *In vitro* studies of melanoma lines (Bittner et al., 2000; Hoek et al., 2006;  
248 Restivo et al., 2017), and later *in vivo* studies (Eichhoff et al., 2010; Hoek et al., 2008; Wouters et al.,  
249 2014), have identified two stable subpopulations in melanoma, characterised by very distinct  
250 transcriptomes: a 'melanocyte-like' state, with high expression of the melanocyte lineage specific

251 transcription factor MITF (Hoek et al., 2006) as well as high SOX10 and PAX3 (Scholl et al., 2001;  
252 Shakhova et al., 2012); and an 'invasive', drug-resistant, mesenchymal-like state with low levels of  
253 MITF, high levels of genes involved in TGF $\beta$  signalling and governed by AP-1 and TEAD transcription  
254 factors (Hoek et al., 2008; Verfaillie et al., 2015). The transcription factor SOX10, a major regulator of  
255 neural crest development and melanocytic differentiation (Harris et al., 2011; Kellerer, 2006), plays an  
256 important role in maintaining the melanocyte-like state, as loss of SOX10 has previously been shown  
257 to upregulate invasive genes such as *JUN*, *AXL*, and *SOX9* (Shaffer et al., 2017; Shakhova et al., 2012;  
258 Verfaillie et al., 2015), increase vemurafenib resistance (Sun et al., 2014), and induce a stable resistant  
259 state regulated by AP-1 (Shaffer et al., 2017). To study the regulatory dynamics of the switch from the  
260 melanocyte-like state towards the mesenchymal-like state, we performed a time series experiment after  
261 knockdown (KD) of SOX10 in two melanocyte-like melanoma cultures (MM057 and MM087)  
262 (Gembarska et al., 2012; Verfaillie et al., 2015) (Fig. 4a). As it is currently unknown whether  
263 melanocyte-like cells within one population follow the same regulatory path during the phenotype  
264 switch, we performed scATAC-seq, using the Fluidigm C1, at 0, 24, 48 and 72 hours after SOX10 KD  
265 (Fig. 4a). After filtering out cells with low signal TSS-aggregation plots, we obtained 598 cells in total  
266 with an average of 54,343 reads per single cell, and a total of 78,262 peaks over all conditions (see  
267 *Methods*). We also performed bulk OmniATAC-seq (Corces et al., 2017) on the same time points and  
268 cell lines to validate the quality of the scATAC-seq data. Aggregated profiles of scATAC-seq data  
269 closely resemble bulk OmniATAC-seq data in the same conditions (Fig. S10a,b) and there was a clear  
270 correlation between the corresponding conditions in bulk and single-cell ATAC-seq samples (average  
271 correlation coefficient of 0.83, Fig. S10c). The effectiveness of the transcriptional switch was confirmed  
272 by the loss of accessibility over time at promoters and enhancers near marker genes of the melanocyte-  
273 like state, such as *DCT* and *TYR*, genes involved in melanin production (Bernd et al., 1994; Iozumi et  
274 al., 1993), and *ERBB3* (Buac et al., 2011) (Fig. 4b and Fig. S11a); and by gain of accessibility of  
275 mesenchymal-like regions such as a *CLDN4* enhancer (Fig. S11b).

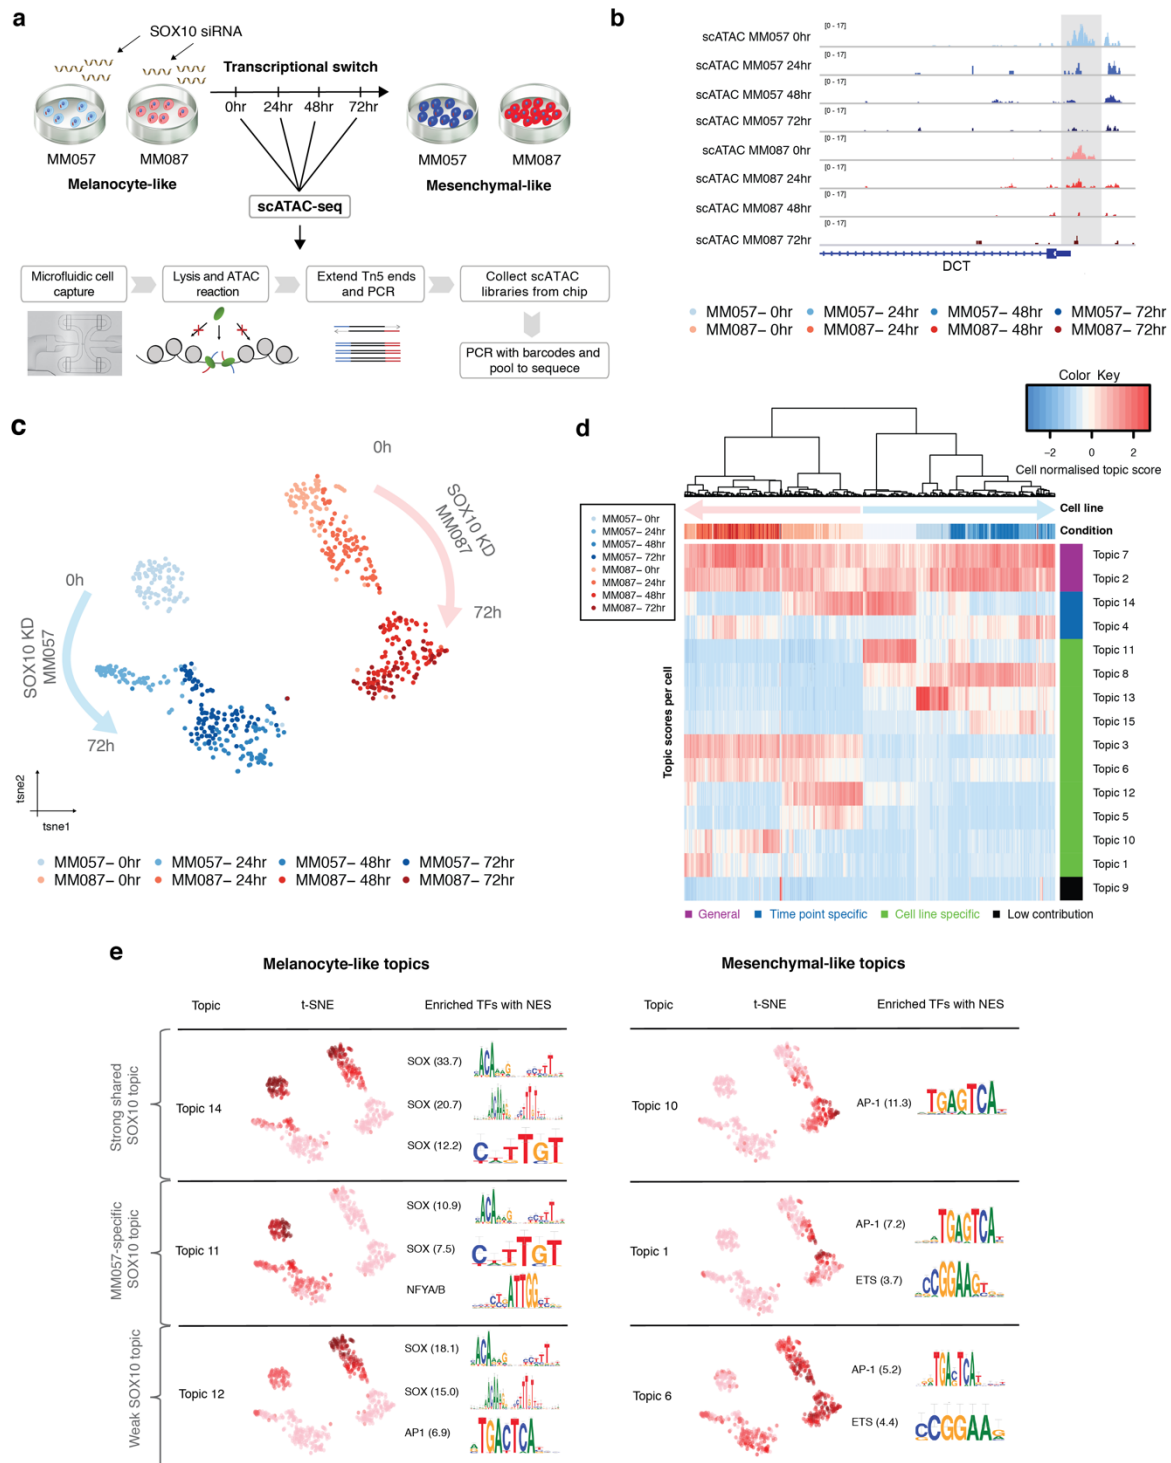

276

277 **Figure 4. scATAC-seq during an EMT-like transition triggered by SOX10 knockdown in melanoma. a.**  
 278 scATAC-seq was performed with the Fluidigm C1 on two melanoma lines (MM057 and MM087) during a  
 279 SOX10-KD-induced transcriptional switch from a melanocyte-like to a mesenchymal-like state at four time points  
 280 (0, 24, 48 and 72 hours post-SOX10-KD). **b.** Profiles of scATAC-seq aggregates per condition in the region  
 281 surrounding *DCT*, a SOX10 target gene that loses accessibility at the SOX10 binding site during the transition. **c.**  
 282 t-SNE-representation (598 single cells) generated by cisTopic using the cell-topic distributions showing the  
 283 dynamics of the switch in MM057 (blue) and MM087 (red) at the four different time points after SOX10-KD. **d.**

284 cisTopic heatmap of topic distributions within the single cells. Several classes of topics are identified, namely  
285 general topics, time point and cell line specific topics. e. cisTopic identifies several melanocyte-like and  
286 mesenchymal-like regulatory topics, represented here as t-SNEs coloured by the topic score together with  
287 representative enriched TF motifs per topic (ordered by Normalised Enrichment Score (NES)).

288 When we applied cisTopic to this dataset we found that a model with 15 regulatory topics best  
289 represented the data (Fig. S12a; Fig. 4c,d). A few topics represent genomic regions that are ubiquitously  
290 accessible, across both cell lines, and across all time points (topic 2 and 7) (Fig. 4d). Regions with high  
291 probability of belonging to these topics are strongly enriched for promoters (Fig. S10b) and for SP1 and  
292 NFY motifs, two common promoter motifs (Fig. S13) (Dyban and Tjian, 1983; Li et al., 1992). The  
293 remaining topics are mostly specific for a cell line, specific for a time point, or specific for a particular  
294 combination of cell line and time point (Fig. 4d; Fig. S13). Several topics represent regions that become  
295 accessible at later time-points after SOX10 knockdown (e.g. topic 10, 1 and 6) (Fig. 4d,e; Fig. S13; Fig.  
296 S14). Particularly, topic 10 is reminiscent of the previously described invasive/mesenchymal-like  
297 epigenome (Verfaillie et al., 2015) (Fig. S15) and genes near topic 10 regions are involved in cell  
298 migration, e.g., *EGFR*, *TGFB2*, *TGFBR2* and *AXL*. Motif discovery on the regions composing topic 10  
299 identified motifs linked to the AP-1 transcription factor family, such as JUNB, JUND and FOS (Fig.  
300 4e), as well as an enrichment of ChIP-seq peaks for TEADs (Fig. S15). As AP-1 and TEAD are known  
301 regulators of melanoma cells in the mesenchymal-like state (Shaffer et al., 2017; Verfaillie et al., 2015),  
302 these results agree with previous findings. We note that all cells undergo similar epigenomic changes  
303 during the transition (Fig. 4c), indicating that, with the resolution obtained by this experiment, there is  
304 no heterogeneity in the way the chromatin changes during the transition.

305 cisTopic also predicts three topics that show a decline in accessibility during the state transition. The  
306 strongest of these topics, topic 14, is shared between the two tested cell lines (Fig. 4d,e; Fig. S14). Two  
307 additional declining topics are specific to either MM057 (topic 11) or MM087 (topic 12) (Fig. 4d,e;  
308 Fig. S14-S16). Motif discovery revealed that the enhancers composing these three ‘melanocyte-like’  
309 topics were highly enriched in motifs linked to the SOX transcription factor family (Fig. 4e). Given that  
310 we knockdowned SOX10 and its role in the melanocyte-like state, SOX10 is the most likely candidate  
311 transcription factor to bind these regions in the melanocyte-like state. Indeed, by comparing these topics  
312 with previously published SOX10 ChIP-seq data obtained from a melanocyte-like melanoma line  
313 (Laurette et al., 2015), we observed strong SOX10 ChIP-seq signal on the regions belonging to these  
314 topics (Fig. S16a). For example, several known, experimentally validated SOX10 target enhancers, such  
315 as binding sites near *ERBB3* (Prasad et al., 2011), *MIA* (Graf et al., 2014), *TYR* (Murisier et al., 2007)  
316 and *DCT* (Potterf et al., 2001) all contain a topic 14 region overlapping with a SOX10 ChIP-seq peak  
317 (Fig. S11a; Fig. S16c). Importantly, the finding that SOX10 KD results in chromatin closing of SOX10  
318 enhancers (topic 11, 12 and 14) suggests that SOX10 is a chromatin modifier. In agreement with this,  
319 loss of SOX10 directly impacts chromatin accessibility (i.e. regions decreasing in accessibility are

320 directly linked to SOX based on motif enrichment); and higher SOX10 protein levels in MM087  
321 compared to MM057 result in longer residence times at shared SOX10 targets, with increased  
322 accessibility of peaks in MM087 as well as a slower SOX10-KD-induced state transition (Fig. S14; Fig.  
323 S16d; Fig. 4c).

324 This study shows that scATAC-seq data during state transitions can be used together with cisTopic to  
325 uncover the regulatory dynamics of biological processes, such as the EMT-like transition in melanoma  
326 induced by knockdown of the transcription factor SOX10. Our results show that all cells follow a  
327 common path during this switch, which involves ~1000 functional SOX10 enhancers that decline in  
328 accessibility during the transition, showing that SOX10 has an effect on the chromatin landscape.

### 329 **A cooperative-pioneer enhancer model for SOXE transcription factors**

330 Regulatory topics identified by cisTopic represent high-quality sets of functional enhancers that allow  
331 in-depth analysis of the composition of transcription factor binding sites. Indeed, the accuracy of  
332 SOX10 enhancer prediction from cisTopic is comparable to the accuracy of ChIP-seq, since the  
333 enrichment of SOX motifs within the SOX10 topic regions is comparable to the enrichment of SOX  
334 motifs in SOX10 ChIP-seq data (NES score of 33.74 for the shared SOX10 topic in melanoma,  
335 compared to 33.79 for SOX10 ChIP-seq in melanoma). We reasoned that cis-regulatory topics can be  
336 used to decipher transcription factor specific enhancer architectures. Particularly, we compared three  
337 different SOXE topics (which comprise SOX8, SOX9, and SOX10 (Wright et al., 1993)); namely the  
338 oligodendrocyte (SOX10) and the astrocyte topic (SOX9) from the human brain data set (Fig. S6, S7)  
339 and the shared SOX10 topic during the melanoma EMT-like transition (topic 14, Fig. 4e). In these three  
340 topics, the top enriched motif is the same SOX dimer (with NES scores of 20.00, 8.78 and 33.74 for  
341 oligodendrocytes, astrocytes and melanoma, respectively). For each of the three topics, we selected the  
342 subset of regulatory regions enriched for SOX motifs (see *Methods*). These three sets of regions are  
343 largely unique (~17% overlap on average) (Fig. 5a). The distinct use of SOX10 enhancers between cell  
344 types is confirmed by plotting the melanoma scATAC-seq signal on the oligodendrocyte and astrocyte  
345 SOX cistromes, as only a limited subset of the brain targets is accessible in melanoma (Fig. 5b). The  
346 finding that SOXE factors regulate distinct targets in different cell types is expected, since they play  
347 different roles depending on the cell type (Harris et al., 2011; Kellerer, 2006; Stolt et al., 2002). Genes  
348 linked to SOX regions exclusively found in the melanoma SOX topic are significantly enriched for the  
349 GO term “pigmentation” (GO:0043473, p-value:  $10^{-3}$ ); genes linked to SOX regions exclusively found  
350 in the oligodendrocyte SOX topic are significantly enriched for the GO term “myelination”  
351 (GO:0042552, p-value:  $10^{-14}$ ); while genes linked to SOX regions exclusively found in the astrocyte  
352 SOX topic are enriched for the GO term “gliogenesis” (GO:0042063, p-value:  $10^{-8}$ ). Note that the entire  
353 set of melanoma regions is also accessible in melanocytes, as shown by DNaseI-seq data in  
354 melanocytes (Fig. S17), suggesting that there are no “ectopic” functional SOX10 binding sites in

355 melanoma beyond those that exist in melanocytes. Therefore, we can exploit the SOX10 topic in  
356 melanoma to investigate the SOX enhancer architecture in melanocytes.

357 How the specificity of these regulatory programs is achieved is largely unknown, although previous  
358 studies investigating SOXE enhancer codes have suggested that cooperativity with other TFs is  
359 common (Hou et al., 2017; Kondoh and Kamachi, 2010; Wilson and Koopman, 2002). To identify the  
360 sequence features that result in SOXE cell type specific programs, we compared the non-overlapping  
361 regions between the selected SOXE cistromes in a pairwise manner, using a Random Forest model (see  
362 *Methods*). Here, we focus on the comparison between the two SOX10 cistromes (in melanoma and  
363 oligodendrocytes), while comparisons between SOX10 and SOX9 cistromes are shown in Fig S21. As  
364 candidate features we used known and *de novo* motifs (from the cisTarget motif collection (Herrmann  
365 et al., 2012; Imrichová et al., 2015) and Homer (Heinz et al., 2010) and RSAT *peak-motifs* (Thomas-  
366 Chollier et al., 2011, 2012), respectively) and DNA shape measurements from GBshape and Kaplan et  
367 al. (Chiu et al., 2015; Kaplan et al., 2009) (Fig. S18). The motifs were scored in the regions using  
368 Cluster-Buster (Frith et al., 2003), selecting as features the best Cis-Regulatory Module (CRM) score  
369 per region; while for DNA shape measurements we used the average value in  $\pm 250$ bp from the centre  
370 of the regions (Fig. S18). A likelihood ratio test between the groups, resulted in 3,816 features selected  
371 (FDR adjusted p-value  $< 0.05$ ). These features were used as input for Boruta (Kursa and Rudnicki,  
372 2010), which found 25 informative features (see *Methods*). Among these 25 features there were several  
373 similar and correlated motifs (e.g. multiple E-box PWMs), which we merged into one Hidden Markov  
374 Model score using Cluster-Buster (Frith et al., 2003), resulting in a final model containing 6 features.  
375 The performance of the RF model with only these 6 features achieved a similar performance compared  
376 to the model using all 25 Boruta features, with an Area Under the Precision Recall (AUPR) of 0.70 and  
377 an Area Under the Curve (AUC) of 0.77 (Fig. 5c1,c2). This simplified model suggests that melanoma-  
378 specific SOX10 binding is determined mainly by co-binding of factors from the TFAP2 (AP-2) and  
379 AP-1 family; while oligodendrocyte-specific binding is determined by co-binding of bHLH family  
380 members of the CAGCTG type, likely reflecting OLIG (Fig. 5c3,c4) (Mazzoni et al., 2011; Yu et al.,  
381 2013). In addition, a *de novo* motif, AnGAA, is found enriched within the SOX melanoma cistrome.  
382 TFAP2 is a plausible candidate for a co-regulatory factor of SOX10 in melanoma and melanocytes  
383 given its important role, along with SOX10, in controlling melanocyte fate (Seberg et al., 2017). Indeed,  
384 the enhancers with predicted SOX10 and TFAP2 binding sites show strong overlap with previously  
385 published TFAP2A ChIP-seq peaks in melanocytes (Fig. S19) (Seberg et al., 2017). Although the MITF  
386 motif was not selected as top feature, the melanoma SOX enhancers also show strong overlap with  
387 MITF-bound regions found by ChIP-seq in melanoma (Fig. S19) (Laurette et al., 2015). Interestingly,  
388 co-occurrence of TFAP2 and MITF binding sites has been previously reported (Seberg et al., 2017).  
389 The AP-1 motif is also very strongly enriched in the melanoma-specific enhancers, and members of the  
390 AP-1 family, like JUN and FOS, are expressed in melanoma and melanocytes, while markedly absent



391 from oligodendrocytes (Fig. S20). Finally, we find a predicted DNA shape feature enriched in the  
 392 melanoma SOX enhancers, namely *rise*, which is positively correlated with other sequence features  
 393 such as GC content, nucleosome occupancy, hydroxyl radical cleavage and propeller twist; and  
 394 negatively correlated with helix twist (Fig. S21). This may suggest that cell type specific SOX10  
 395 binding may, next to distinct co-factors, also require a specific sequence environment. A similar  
 396 analysis of SOX10 enhancers versus SOX9 enhancers (oligodendrocyte versus astrocyte and melanoma  
 397 versus astrocyte cistromes, respectively) revealed features such as NFIA/B motifs strongly enriched in  
 398 astrocyte enhancers, which is in agreement with literature (Kang et al., 2012) (Fig. S22).

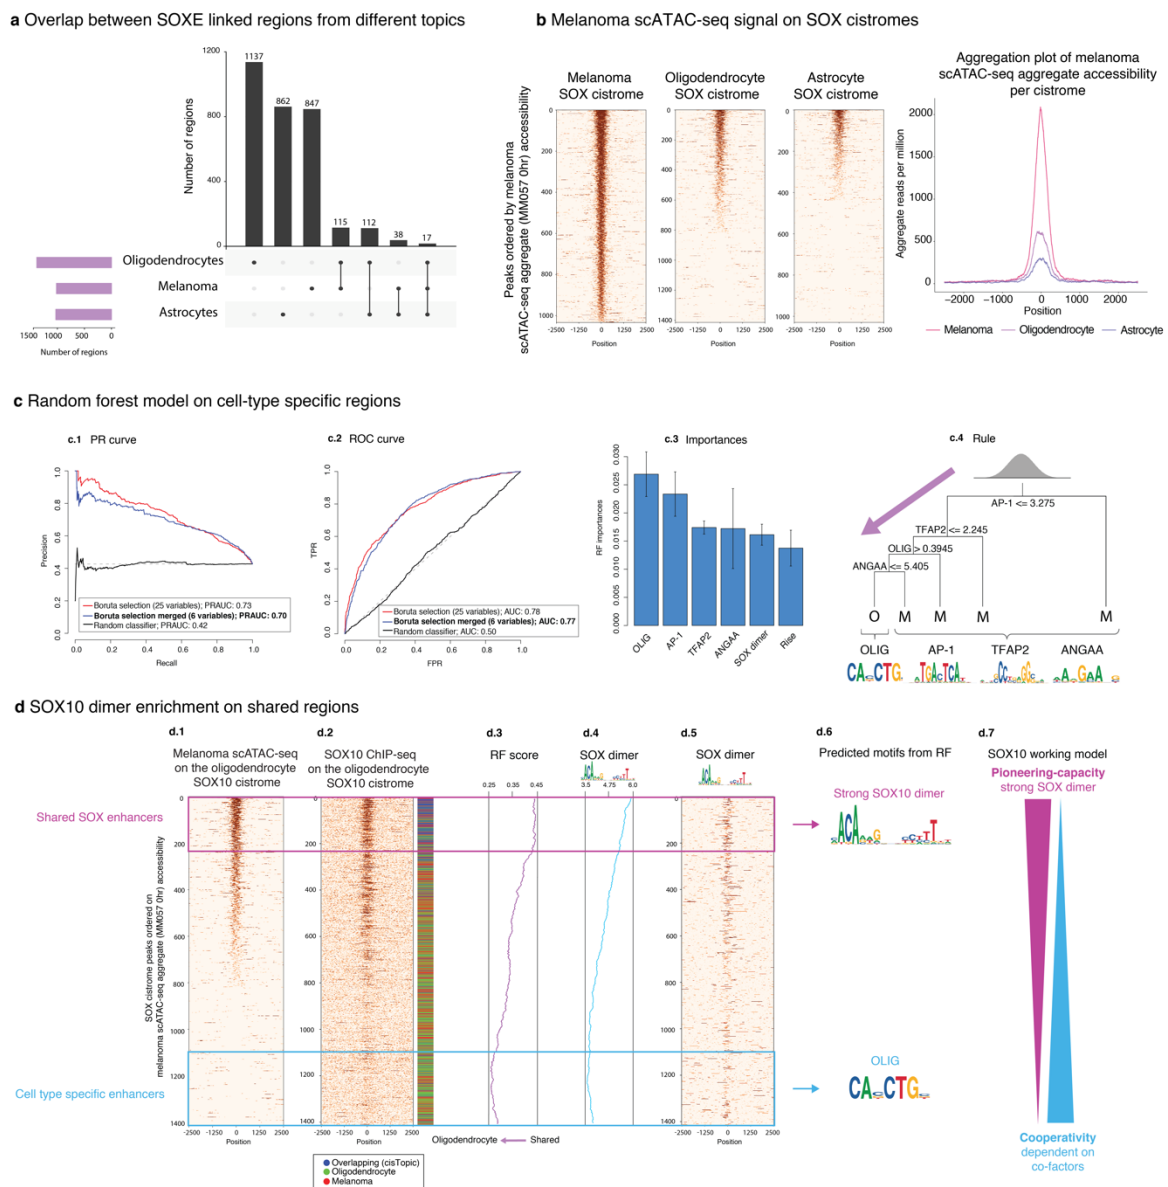

399

400 **Figure 5. Comparison of SOXE cis-topics between cell types.** **a.** Number of unique and overlapping regions  
 401 between the oligodendrocyte, melanoma and astrocyte SOX cistromes. **b.** Heatmaps and aggregation plot showing  
 402 melanoma scATAC-seq signal on the melanoma, oligodendrocyte and astrocyte SOX cistrome regions. Cistrome

403 peaks are ranked according to their scATAC-seq accessibility in melanoma (MM057, 0 hours after SOX10-KD).  
404 **c.** Random forest model to discriminate between melanoma and oligodendrocyte specific SOX regions. **c.1.**  
405 Precision Recall (PR) and **c.2.** Receiver Operating Characteristic (ROC) curves for different Random Forest  
406 models using either 25 variables after Boruta selection, 6 variables after merging correlating variables from  
407 Boruta, or a random classifier. **c.3.** Variable importances for the RF model with merged motif features **c.4.**  
408 Representative rule extracted from the Random Forest model with InTrees (Deng, 2014). Each root represents a  
409 decision point with a rule based on one of the variables (CRM scores) used in the RF model (if the rule is fulfilled,  
410 the left path is taken). The leaves represent the class assigned (O: Oligodendrocytes; M: Melanoma). The motifs  
411 used in the RF model with 6 variables are shown under the rule tree, showing whether they are either melanoma  
412 or oligodendrocyte specific. **d.** **d.1.** Heatmap showing scATAC-seq signal and **d.2.** SOX10 ChIP-seq on the  
413 oligodendrocyte SOX cistrome region ranked according to their scATAC-seq accessibility in melanoma. The  
414 colour bar next to the heatmaps represents whether the regions were either overlapping with regions with the other  
415 SOX cistromes (blue), whether they were correctly classified as an oligodendrocyte region using the rule extracted  
416 with Intrees (green) or whether they were misclassified as melanoma regions (red). Regions that are not unique to  
417 the oligodendrocyte SOX10 cistrome (blue) are enriched on top of the heatmap, meaning that they are also  
418 accessible in melanoma, and have higher SOX10 ChIP-seq signal. These regions are highlighted by the pink box  
419 as shared SOX enhancers. Regions that are specific to oligodendrocytes are enriched at the bottom of the heatmaps  
420 and are highlighted by the blue box. **d.3.** RF scores for the heatmap regions. **d.4.** SOX dimer CRM scores for the  
421 heatmap regions. **d.5.** Heatmap representing SOX10 CRMs in the sequences. **d.6.** Logos of motifs enriched in the  
422 shared SOX enhancer and the oligodendrocyte-specific enhancers as found by RF. **d.7.** Representation of the  
423 potential model. Shared regions are enriched for SOX dimers, while cell type-specific regions are enriched for co-  
424 factors.

425 Next, we investigated the SOX regulatory regions that show shared accessibility across multiple cell  
426 types. As expected, these shared regions cannot be classified into one of the cell types with our trained  
427 RF model, having a RF score of around 0.5 (Fig. 5d3). When comparing these shared regions to cell  
428 type specific regions, we found that shared enhancers show higher SOX10 ChIP-seq signal (Fig 5d1,2),  
429 and stronger SOX10 dimer motifs (LRT FDR p-value:  $10^{-9}$ ) compared to the cell type specific enhancers  
430 (Fig 5d4,5,6). Interestingly, monomer motifs are not enriched in the shared regions (LRT FDR p-value:  
431 0.78). Altogether, these findings indicate that shared enhancers could be bound by SOX10 homodimers  
432 alone (or for example SOX10-SOX8 heterodimers), with longer residence time; whereas cell type  
433 specific enhancers have weaker SOX10 dimer motifs, avoiding activation in the wrong cell type, but  
434 more prevalent co-regulatory motifs to regulate their distinct function (Fig. 5d7).

435 We further tested this hypothesis using enhancer-reporter assays (Fig. S23). The DCT enhancer, which  
436 is specific for melanoma, has strong predicted TFAP2, AP-1, and MITF CRM scores (SOX dimer: 4.50;  
437 TFAP2: 2.43; AP-1: 0.269; MITF: 5.77). Mutating the MITF binding sites abolishes the DCT enhancer  
438 activity. On the other hand, the EDNRB enhancer, which is also accessible in the brain, has stronger  
439 SOX10 binding sites (SOX dimer: 8.56), but weaker co-factor CRMs (AP-1: 0; TFAP2: 1.44; MITF:  
440 0.905). Indeed, mutating E-boxes in the EDNRB enhancer did not have a significant effect on enhancer

441 activity (Fig. S23). This indicates that cell type specific enhancers, with strong co-factor motifs, are  
442 more prone to losing their activity when the specific co-factor is not present; whereas enhancers that  
443 are accessible in several cell types and contain strong SOX10 dimer motifs are nearly unaffected by  
444 loss of the co-factor. Note that for both enhancers, mutating the SOX10 motif completely abolishes  
445 enhancer activity (Fig. S23).

446 In conclusion, regulatory topics identified by cisTopic, based only on single-cell ATAC-seq data,  
447 represent functional enhancers of high quality that can be used to decipher the regulatory logic of  
448 enhancer specificity. When applied to study SOXE enhancers, we found that certain SOX regulatory  
449 regions are specifically accessible in a given cell type; while others are accessible across systems. Using  
450 Random Forest models we could distinguish between melanoma- and oligodendrocyte-specific SOX  
451 enhancers based on motifs of cooperatively bound transcription factors; while we found that shared  
452 SOX10 enhancers show a preference for SOX10 dimer motifs and may be driven by pioneering activity  
453 of SOX10.

454

## 455 Discussion

456 Single-cell epigenomics, particularly single-cell ATAC-seq, yield unprecedented insight into chromatin  
457 landscapes of individual cells. However, for each individual cell only a very limited number of  
458 accessible regions can be sampled, i.e. ~10% of all open regions. In other words, the data obtained from  
459 a single cell cannot be used directly to predict which genomic regions are accessible. To overcome this  
460 problem, currently available methods either aggregate ATAC-seq reads across a set of “similar” cells,  
461 following a cell clustering based on dimensionality reduction (e.g., scABC and LSI (Cusanovich et al.,  
462 2015, 2018; Zamanighomi et al., 2018)); or alternatively, aggregate ATAC-seq reads per cell across a  
463 predefined set of genomic regions (de Boer and Regev, 2017; Ji et al., 2017; Schep et al., 2017).  
464 Although these solutions have been shown to be satisfactory to cluster cells and to identify cell types,  
465 they do not allow the *ab initio* identification of co-regulatory regions (or *cis-regulatory topics*). Here,  
466 we have shown that Bayesian topic modelling, particularly LDA, allows the simultaneous discovery of  
467 *cis-topics* and cell types. LDA groups features into topics with a certain score (i.e. a feature can belong  
468 to several topics with different preferences); and objects can be represented as a mixture of topics.  
469 Compared with the discrete approach taken by conventional clustering methods (i.e. a feature or object  
470 can only belong to one group), this algorithm results in less information loss.

471 Topic modelling has been previously used in other fields for dealing with noisy data, such as text  
472 mining, image processing and forensics (Blei et al., 2003; Kuang et al., 2017; Rasiwasia and  
473 Vasconcelos, 2013). We have extrapolated this framework to single-cell epigenomics, by considering  
474 cells as objects; genomic regions as features; and *cis-regulatory topics* (or *cis-topics*) as topics. In  
475 agreement with the high accuracy of LDA in other fields, *cisTopic* groups cells into cell types and cell  
476 states, even when data is extremely sparse, with higher accuracy than currently published methods; and  
477 simultaneously group genomic regions into *cis-topics*; something that, to our knowledge, has not been  
478 shown before. Furthermore, *cisTopic* also includes functionalities to explore the output of LDA for  
479 biological interpretation. For example, topic contributions within cells can be used for cell type  
480 identification (i.e. clustering, tSNE), while regulatory topics can be used to decipher cell-state specific  
481 regulation (i.e. motif enrichment and machine learning).

482 The performance of *cisTopic* was confirmed on simulated H3K27Ac ChIP-seq data, which we believe  
483 represents a relevant test case, given that the recently developed single-cell CUT&RUN (an alternative  
484 to ChIP-seq to profile TF binding or histone modifications in single cells) will likely be widely adopted  
485 (Hainer et al., 2018). Our results on 14 melanoma cell lines showed that cell clustering is 96% accurate  
486 even with as few as 3,000 reads per cell. More importantly, the predicted topics reveal meaningful  
487 regulatory programs, some cell-type specific, and some shared by cell lines from the same melanoma  
488 subtype.

489 Single-cell epigenomics data sets are becoming increasingly large: recent data sets obtained from the  
490 *Drosophila* embryo (Cusanovich et al., 2018) and the human brain (Lake et al., 2017) contain more than  
491 30,000 cells. Thanks to a binarisation step, and the use of a collapsed Gibbs sampler, cisTopic is  
492 computationally efficient to analyse such large data sets. By increasing the number of cells, but also by  
493 combining multiple single-cell omics layers, like scATAC-seq and scRNA-seq, the power to detect new  
494 and rare cell types and subpopulations from heterogeneous tissues becomes more and more feasible.  
495 Previously, Lake et al. (2017) combined the analysis of scATAC-seq and scRNA-seq data using  
496 Gradient Boosting Machines, which allowed them to identify subpopulations of inhibitory and  
497 excitatory neurons at the chromatin level. Interestingly, in our study, using cisTopic, we could identify  
498 the same subpopulations *ab initio* from uniquely the scATAC-seq data. The predicted topics and  
499 candidate transcription factors were then confirmed *a posteriori*, through an independent network  
500 analysis of the corresponding scRNA-seq data. The finding that epigenome-based cis-topics correspond  
501 to gene regulatory networks is encouraging for future studies, particularly when single-cell multi-omics  
502 strategies can be up-scaled (Angermueller et al., 2016; Hu et al., 2016; Pott, 2016).

503 scATAC-seq has been mainly applied to complex tissue samples, such as the hematopoietic system, the  
504 human and mouse brain, and the *Drosophila* embryo (Corces et al., 2016; Cusanovich et al., 2018; Lake  
505 et al., 2017; Preissl et al., 2018), to identify cell types and find cell type specific epigenomic signatures.  
506 Here we have shown that scATAC-seq is informative to report dynamic changes in chromatin  
507 accessibility during a time series experiment, in this case after a transcription factor perturbation. Using  
508 cisTopic we found that knockdown of SOX10 causes a fast decline of accessibility of functional SOX10  
509 binding sites in melanoma cells, which yielded a conserved topic of around 1000 enhancers with SOX10  
510 binding sites. Furthermore, our analysis also revealed differences in the dynamics and quantitative  
511 aspects between the cell lines. Altogether, we showed that SOX10 is a chromatin modifier and that,  
512 with the resolution of this experiment, chromatin dynamics during the EMT-like state transition occurs  
513 homogeneously across all cells of the same cell line.

514 We found a core SOX10 topic that is shared across a panel of melanoma cultures, as well as in  
515 melanocytes. In the melanocyte lineage, SOX10 is known as a lineage factor, together with MITF,  
516 TFAP2A, and PAX3 (Hoek et al., 2006; Scholl et al., 2001; Seberg et al., 2017; Shakhova et al., 2012).  
517 Of these transcription factors, Random Forest modelling identified the TFAP2A motif as the most  
518 informative feature, allowing to discriminate SOX10 binding in melanocytes versus other cell types,  
519 such as oligodendrocytes. In oligodendrocytes, known co-regulatory factors include OLIG1/2 (Yu et  
520 al., 2013; Zhou and Anderson, 2002). Indeed, the OLIG1/2 E-box motifs are highly informative for the  
521 classification of SOX10 binding sites in oligodendrocytes. This principle of TF cooperativity to activate  
522 enhancers in a cell-type specific manner, was confirmed by comparing these SOX10 cis-topics with a  
523 SOX9 cis-topic found in astrocytes, which share an identical SOX dimer motif with the SOX10 cis-  
524 topics. In this case, Random Forest feature selection and classification resulted in NFIA/B as the most

525 informative cooperative motif. We were intrigued by the observation that a subset of SOX10 enhancers  
526 (17%) are shared between these cell types. SOX10 may bind strongly to these regions as SOX dimer  
527 motif scores are higher in these regions, and cofactor motifs lower. These observations lead to an  
528 enhancer model where one transcription factor has a probabilistic spectrum of binding modalities, from  
529 pioneering to cooperativity.

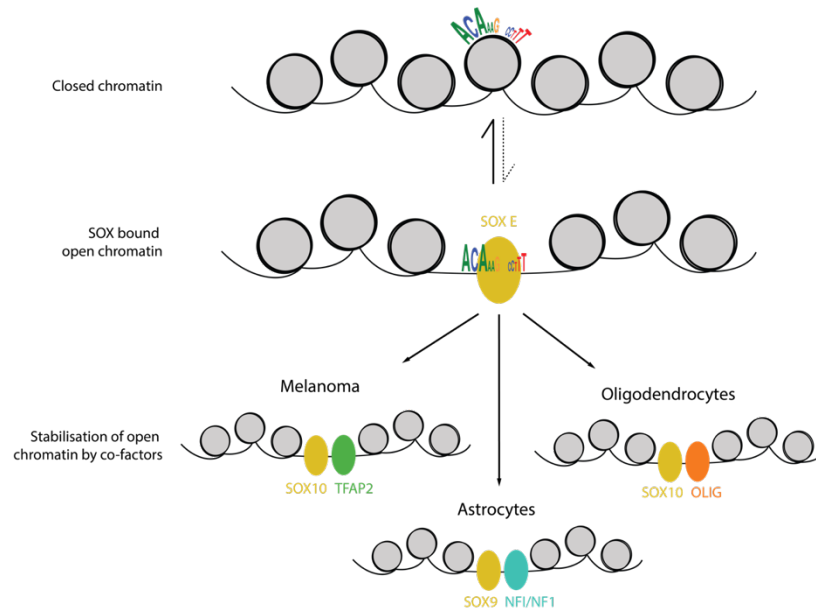

530

531 **Figure 6. Quantitative pioneering function of SOXE proteins depends on binding stabilisation by cell-type**  
532 **specific co-factors.** SOXE proteins are able to recognise their binding sites; however, when the binding site is not  
533 strong enough, they require the help of additional cell type-specific co-factors, such as TFAP2 in melanoma,  
534 OLIG in oligodendrocytes and NFI in astrocytes, to be stable.

535 In conclusion, we introduce a new concept in the field of single-cell regulatory genomics, namely the  
536 cis-regulatory topic, analogous to topics in literature. We provide an easy-to-use R/Bioconductor  
537 package, called cisTopic, to discover and interpret regulatory topics and cell states from any type of  
538 single-cell epigenomics data. We believe cisTopic provides a valuable component in the analysis of  
539 large-scale single-cell epigenomics data sets, as it jointly optimises cell clustering and enhancer  
540 categorization, to identify subpopulations of cells based on shared epigenomic landscapes.

541

542

543

544

545

546

547

## 548 **Methods**

### 549 **cisTopic workflow**

550

551 cisTopic consists of 4 main steps: (1) generation of a binary accessibility matrix as input for Latent  
552 Dirichlet Allocation (LDA); (2) LDA and model selection; (3) cell state identification using the topic-  
553 cell distributions from LDA and (4) exploration of the region-topic distributions. cisTopic is available  
554 as an R/Bioconductor package at: <http://github.com/aertslab/cistopic>.

555 **Input and binarisation:** The input for cisTopic is a binary accessibility matrix, which can be built from  
556 a set of single-cell bam files and a bed file with candidate regulatory regions (e.g. from peak calling on  
557 the aggregate or the bulk profile). In the case of single-end reads, we count a fragment if its 5' end falls  
558 within the region; in the case of paired end data, if any of its ends falls within the region. By default,  
559 we consider a region accessible if at least one read is found, leading to a binarised count matrix. In the  
560 case of single-cell methylation data, the matrix can be built from the beta values scores per region per  
561 cell, which can be also calculated if the user provides the methylation call files (i.e. tab-delimited files  
562 containing chromosome, position, number of methylated reads and total number of reads). By default,  
563 we consider a region methylated if the beta value is above 0.5. Note that regions have been blacklisted  
564 for potential artefacts prior to the analysis  
565 (<http://mitra.stanford.edu/kundaje/akundaje/release/blacklists/>).

566 **Modelling via Latent Dirichlet Allocation:** The next step in the cisTopic workflow is to use Latent  
567 Dirichlet Allocation (LDA) for the modelling of cis-regulatory topics. LDA allows to derive, from the  
568 original high-dimensional and sparse data, (1) the probability distributions over the topics for each cell  
569 in the data set ( $\theta$ ) and (2) the probability distributions over the regions for each topic ( $\phi$ ) (Blei et al.,  
570 2003). These distributions indicate, respectively, how important a regulatory topic is for a cell ( $\theta$ ), and  
571 how important regions are for the regulatory topic ( $\phi$ ). Here, we use a collapsed Gibbs sampler (Griffiths  
572 and Steyvers, 2004), in which we assign regions to a certain topic by randomly sampling from a  
573 distribution where the probability of a region being assigned to a topic is proportional to the  
574 contributions of that region to the topic and the contributions of that topic in a cell:

575

$$P(z_i = t | z_{-i}, r) \propto \frac{n_{-i,t}^{(r)} + \beta}{n_{-i,t} + R\beta} \frac{n_{-i,t}^{(c)} + \alpha}{n_{-i}^{(c)} + T\alpha}$$

576 Where:

- 577
- $z_i$  is the current assignment to be made,
  - $z_{-i}$  are the rest of assignments in the data set,
- 578

579 •  $t$  is the given topic,  
580 •  $r$  is the given region,  
581 • and  $P(z_i = t | z_{-i}, r)$  is the probability of assigning the given region  $r$  to a regulatory topic  $t$  given  
582 the rest of the assignments in the data set.

583

584 •  $n_{-i,t}^{(r)}$  is the number of times the given region  $r$  is assigned to topic  $t$  without considering the  
585 region we want to assign,  
586 •  $\beta$  is the Dirichlet hyperparameter of the prior distribution for the categorical distribution over  
587 regions in a topic  $\phi_r^{(t)}$ . Here, we use symmetric Dirichlet priors for all topics, using 0.1 as value  
588 for  $\beta$ .  
589 •  $n_{-i,t}$  is the total number of assignments to topic  $t$  through the data set,  
590 •  $R$  is the total number of regions in the data set,  
591 • and  $\frac{n_{-i,t}^{(r)} + \beta}{n_{-i,t} + R\beta}$  expresses the probability of region  $r$  under topic  $t$ .

592

593 •  $n_{-i,t}^{(c)}$  is the total number of assignments to topic  $t$  within the given cell  $c$  (without considering  
594 the region to be assigned),  
595 •  $\alpha$  is the Dirichlet hyperparameter of the prior distribution for the categorical distribution over  
596 topics in a cell  $\theta^{(c)}$ . Here, we use symmetric Dirichlet priors for all cells, using  $50/T$  as value  
597 for  $\alpha$ .  
598 •  $n_{-i}^{(c)}$  is the total number of assignments within the given cell  $c$ ,  
599 •  $T$  is the total number of topics in the model. The total number of topics has to be provided (see  
600 *Model selection*),  
601 • and  $\frac{n_{-i,t}^{(c)} + \alpha}{n_{-i}^{(c)} + T\alpha}$  is the probability of topic  $t$  under cell  $c$ .

602 After enough iterations through every region in each cell in the data set, this distribution is stabilised,  
603 and assignments can be recorded. In most cases, we used 500 as burn-in and 1000 recording iterations  
604 (see *Model selection* and *Data analysis*). LDA provides two matrices, one containing the total number  
605 of assignments per topic in each cell, and another containing the total number of assignments per region  
606 to each topic. Models are built using the *lda* R package (Chang, 2015).

607 **Model selection:** For performing LDA, values for the Dirichlet priors  $\alpha$  and  $\beta$ , the number of topics  $T$   
608 and the number of iterations (burn-in and recording iterations) must be provided. We used  $50/T$  and 0.1  
609 for  $\alpha$  and  $\beta$ , respectively, as recommended by Griffiths & Steyvers (2004). The log-likelihood per  
610 iteration in each model was plotted for confirming that the number of burn-in and recording iterations



611 was correctly chosen (i.e. log-likelihood of the model must be stabilized when the recording of iterations  
612 starts). Several models with different number of topics were run (generally, from 5 to 50 topics; see  
613 *Data analysis*), and the optimal number of topics is selected based on the highest log-likelihood in the  
614 last iteration.

615 **Cell state identification:** Using the normalised topic-cell distributions (i.e. a matrix containing cells as  
616 columns, topics as rows, and normalised assignments per cell as values), cell states are visualized using  
617 dimensionality reduction methods such as tSNE (R package Rtsne (Krijthe and van der Maaten, 2017)),  
618 PCA and/or diffusion maps (R package Destiny (Angerer et al., 2016)). Hierarchical clustering with  
619 euclidean distances and ward clustering is used for the topic-cell heatmaps.

620 **Topic exploration:** The region-topic distributions can be explored in different ways to understand the  
621 biological nature of the regulatory topics:

- 622 • **Enrichment of epigenomic signatures:** Epigenomic signatures are intersected with the  
623 regulatory regions in the data set (by default, with at least 40% overlap) and summarized into  
624 region sets. These region sets are used, together with the normalised region-topic distributions  
625 as input for AUCCell (Aibar et al., 2017). Here, we used as threshold to calculate the AUC 3%  
626 of the total number of regions in the dataset.
- 627 • **Region annotation:** Regions in the data set are annotated using the R package CHIPseeker (Yu  
628 et al., 2015). Enrichment of region types within the topics is calculated as previously explained.
- 629 • **Topic binarisation:** Representative regions of each topic are selected by rescaling the  
630 normalised region-topic assignments to the unit, and fitting a gamma distribution to these  
631 values. A threshold is given to select region above a certain probability (see *Data analysis*).
- 632 • **Gene Ontology analysis:** GO analyses was performed by using rGREAT on the binarised  
633 topics (Gu, 2018).
- 634 • **Motif enrichment:** Motif enrichment was performed using a RcisTarget (Aibar et al., 2017).  
635 cisTopic includes functions for performing motif enrichment analysis in sets of regions, rather  
636 than sets of genes. Here, we used the region-based hg19 cisTarget feather databases (v8). The  
637 cisTarget motif collection comprehends more than 20,000 PWMs obtained from JASPAR  
638 (Portales-Casamar et al., 2010), cis-bp (Weirauch et al., 2014), Hocomoco (Kulakovskiy et al.,  
639 2018), among others (Janky et al., 2014). We used a minimum fraction overlap of 0.4; a  
640 minimum Normalised Enrichment Score (NES) threshold of 3; a ROC threshold for AUC  
641 calculation of 0.005 and a threshold for visualization of 20,000. Region-based feather databases  
642 are available at: <https://resources.aertslab.org/cistarget/>. Motif annotation is available within  
643 the RcisTarget package.
- 644 • **Cistrome formation:** Cistromes can be formed based on RcisTarget results; by selecting the  
645 regions that pass the given thresholds. These sets of regions are linked to transcription factors

646 based on motif annotations (direct and inferred). These cistromes are initially formed by Ctx  
647 regions (Imrichová et al., 2015), that are mapped back to the original coordinates in the data set  
648 (here, regions are mapped back if there is at least 40% of overlap).

#### 649 **Validation of cisTopic**

650 ***Simulated epigenomes from melanoma cell lines:*** We simulated 700 single-cell epigenomes from 14  
651 bulk H3K27Ac ChIP-seq melanoma profiles (50 cells per bulk) by randomly sampling a given number  
652 of reads. Eleven of these bulk epigenomes were taken from Verfaillie, Imrichová & Kalender-Atak et  
653 al. (2015, GSE60666); and three have been generated in this work with the same protocol and analysis  
654 pipeline. Candidate regulatory regions were defined by peak calling with MACS2 in each bulk profile  
655 (v.2.0.10, with  $q < 0.001$  and nomodel parameters and using as control the merged control profiles of  
656 five cell lines; namely A375, MM011, MM032, MM047 and MM057) and merging of overlapping  
657 peaks. The number of reads per cell was selected randomly from the intervals corresponding to each  
658 simulation, namely 26,940-59,580 reads per cell; 8,980-19,860 reads per cell; 5,388-11,916 reads per  
659 cell and 2,694-5,958 reads per cell. For each simulation we ran cisTopic (parameters:  $\alpha=50/T$ ;  $\beta=0.1$ ;  
660 burn-in iterations=500; recording iterations=1000) for models with a number of topics between 2 to 50  
661 (from 2 to 30, 1 by 1; from 30 to 5, by 5). The best model in each simulation was selected based on the  
662 highest log-likelihood, resulting in selected models with 22, 22, 19 and 12 topics, from highest to lowest  
663 coverage. We binarised the topics using a probability threshold of 0.975, and performed GO enrichment  
664 analysis with rGREAT and motif enrichment analysis with ReisTarget. Latent Semantic Indexing (LSI)  
665 was performed as described by Cusanovich et al., 2015. The number of PCs selected was 7, 5, 5 and 5,  
666 for the different coverages respectively; and the first principal component was removed in all cases as  
667 it was correlated with the read depth. Values of the LSI matrix were rescaled between  $\pm 1.5$ . We ran  
668 chromVAR (Schep et al., 2017) with default parameters and adding the GC bias. We run scABC with  
669 default parameters, resulting in models with 14, 14, 13 and 7 landmarks (Zamanighomi et al., 2018).  
670 Rtsne was used for visualization in all cases with 50 PCs and 30 as perplexity (after testing several  
671 combinations of parameters) (Krijthe and van der Maaten, 2017). For calculating the Adjusted Rand  
672 Index, we used as ground truth the bulk epigenome of each cell and determined the cell clusters from  
673 each method using euclidean distance and ward clustering (using the cell-topic distributions matrix from  
674 cisTopic, the LSI matrix, the cistrome enrichment matrix from chromVAR and the cell-to-landmark  
675 matrix from scABC, respectively). We also tested the robustness of these methods to find rare  
676 subpopulations by reducing the number of single-cell epigenomes from 50 to 5 for 3 of these cell lines  
677 (A375, MM001 and MM099). Methods were run as previously described, and precision and recall  
678 values were calculated by using as ground truth the bulk epigenome of each cell. The cell clusters were  
679 clustered for each method using euclidean distances and ward clustering. The clusters with the highest  
680 ratio of true positives versus false positives were selected for the calculations.

681 ***scATAC-seq in the hematopoietic system:*** We used cisTopic on a publicly available scATAC-seq data  
682 set from the hematopoietic system (Corces et al., 2016; GSE74310), containing Leukemia Stem Cells  
683 (LSC), blasts and monocytes. We used cells with more than 784 reads per cell, resulting in a data set  
684 with 71 LSCs, 115 blasts and 77 monocytes and 296,285 regulatory regions. We ran cisTopic using  
685  $\alpha=50/T$ ;  $\beta=0.1$ ; burn-in iterations=200; recording iterations=1000 and models with a number of topics  
686 between 2 and 50 (by 2). The selected model had 10 topics. We binarised the topics with a probability  
687 threshold of 0.995.

688 ***scWGBS in the hematopoietic system:*** We applied cisTopic on a publicly available scWGBS data set  
689 from the hematopoietic system (Farlik et al., 2016; GSE87197), containing methylation calls for 18  
690 Hematopoietic Stem Cells (HSC), 18 Multipotent Progenitors (MPP), 24 Multi-Lymphoid Progenitors  
691 (MLP), 19 Common Myeloid Progenitors (CMP) and 22 Granulocyte Macrophage Progenitors (GMP).  
692 We aggregated the methylation calls using the Ensemble regulatory regions (v78) and calculated the  $\beta$   
693 values by dividing the aggregated number of methylated calls by the total number of calls, resulting in  
694 410,037 regulatory regions. This matrix was binarised, considering as methylated regions with a  $\beta$  value  
695 above 0.5. We performed models using with  $\alpha=50/T$ ;  $\beta=0.1$ ; burn-in iterations=500; recording  
696 iterations=1000; and a number of topics between 5 and 50 (by 5), resulting in a model with 10 topics to  
697 be selected. We binarised the topics with a probability threshold of 0.995 and lift-overed the regions  
698 from hg38 to hg19 before using RcisTarget.

699 ***scTHS-seq and scRNA-seq in the human brain:*** We analysed a data set from the human brain with  
700 34,520 cells and 287,381 regulatory regions (Lake et al., 2018; GSE97942). This data set contains cells  
701 from the visual cortex, the frontal cortex and the cerebellum. We ran cisTopic with  $\alpha=50/T$ ;  $\beta=0.1$ ;  
702 burn-in iterations=500; recording iterations=1000; and a number of topics between 5 and 50 (from 2 to  
703 30 by 1; from 30 to 50 by 5), resulting in a model with 23 topics to be selected. We binarised the topics  
704 with a probability threshold of 0.99 and lift-overed the regions from hg38 to hg19 before using  
705 RcisTarget and rGREAT.

706 We filtered the scRNA-seq data from Lake et al. (2018) (GSE97930) keeping only cells with at least  
707 800 genes expressed, resulting in a data set with 15,884 cells. SCENIC was run using default parameters  
708 (Aibar et al., 2017), resulting in a matrix with 250 regulons. Next, we mapped the regions to their closest  
709 gene, and this dictionary was used to convert the gene-based regulons to region-based regulons. These  
710 region sets were used as epigenomic signatures to determine their enrichment within the topics using  
711 AUCell as previously explained.

712 ***scATAC-seq during an EMT-like transition in melanoma:*** We generated scATAC-seq data on  
713 different time points (0, 24, 48 and 72h) for two melanoma cell lines (MM057 and MM087) upon  
714 SOX10 KD, which triggers an EMT-like cell state transition, resulting in a data set with 598 and 78,262  
715 accessible regions (see below). We ran cisTopic with  $\alpha=50/T$ ;  $\beta=0.1$ ; burn-in iterations=500; recording

716 iterations=1000; and a number of topics between 5 and 50 (from 2 to 30 by 1; from 30 to 50 by 5),  
717 finding a model with 15 topics to be optimal. Topics were binarised using a probability threshold of  
718 0.975 before RcisTarget and rGREAT analyses.

### 719 **Random forest modelling**

720 SOX region sets were derived by merging the SOX cistromes found in the astrocytes, oligodendrocytes  
721 and shared melanoma topics, respectively. Regions were scored with Cluster Buster (Frith et al., 2003)  
722 using known and *de novo* motifs, and the value for the best CRM score in the sequence was used as  
723 feature. Known motifs were taken from the cisTarget (Herrmann et al., 2012; Imrichová et al., 2015)  
724 motif collection (see above); while *de novo* motifs were found by comparing non-overlapping regions  
725 between the SOX cistromes in a pairwise manner with Homer (Heinz et al., 2010) and RSAT *peak-*  
726 *motifs* (Thomas-Chollier et al., 2011, 2012). DNA shape measurements were also included as features.  
727 They were derived from models found in GBshape and Kaplan et al. (Chiu et al., 2015; Kaplan et al.,  
728 2009), using the average value between  $\pm 250$  bp from the centre of the region. Comparisons were done  
729 in a pairwise manner. Per comparison, an initial selection of features was performed using a likelihood  
730 ratio test (FDR adjusted p-value < 0.05), as implemented in MAST (Finak et al., 2015). These initial  
731 features were further pruned using Boruta (Kursa and Rudnicki, 2010), using default parameters. Boruta  
732 features that represented similar motifs and showed strong correlation were merged into one Hidden  
733 Markov Model score using Cluster-Buster (Frith et al., 2003). Random forest models were performed  
734 with each set of features (namely Boruta features, merged features and a random classifier) using the  
735 randomForest R package (Liaw and Wiener, 2001). Representative rules were extracted using the  
736 package iTrees (Deng, 2014), with default parameters.

### 737 **Cell culture and treatment**

738 The two melanoma cultures (MM057 and MM087) are short-term cultures derived from patient biopsies  
739 (Gembarska et al., 2012; Verfaillie et al., 2015). Cells were kept at 37°C, with 5% CO<sub>2</sub> and were  
740 maintained in Ham's F10 nutrient mix (Thermo Fished Scientific) supplemented with 10% fetal bovine  
741 serum (FBS; Invitrogen) and 100  $\mu\text{g ml}^{-1}$  penicillin/streptomycin (Thermo Fished Scientific). SOX10  
742 KD was performed using a SMARTpool of four siRNAs against SOX10 (SMARTpool: ON-  
743 TARGETplus SOX10 siRNA, number L017192-00-0005, Dharmacon) at a concentration of 20nM  
744 using as medium Opti-MEM (Thermo Fished Scientific) and omitting antibiotics. The cells were  
745 incubated for 24, 48 or 72 hours before processing.

### 746 **OmniATAC-seq**

747 **Data generation:** OmniATAC-seq was performed as described previously (Corces et al., 2017). Cells  
748 were washed, trypsinised, spun down at 1000 RPM for 5 min to remove the medium and resuspended  
749 in 1 mL. Cells were counted and experiments were only continued when a viability of above 90% was  
750 observed. 50,000 cells were pelleted at 500 RCF at 4°C for 5 min, medium was carefully aspirated and

751 the cells were washed and lysed using 50 uL of cold ATAC-Resuspension Buffer (RSB) (see Corces et  
752 al., 2017 for composition) containing 0.1% NP40, 0.1% Tween-20 and 0.01% digitonin by pipetting up  
753 and down three times and incubating the cells for 3 min on ice. The lysis was washed out by adding 1  
754 mL of cold ATAC-RSB containing 0.1% Tween-20 and inverting the tube three times. Nuclei were  
755 pelleted at 500 RCF for 10 min at 4°C, the supernatant was carefully removed and nuclei were  
756 resuspended in 50 uL of transposition mixture (25 uL 2x TD buffer (see Corces et al., 2017 for  
757 composition), 2.5 uL transposase (100 nM), 16.5 uL DPBS, 0.5 uL 1% digitonin, 0.5 uL 10% Tween-  
758 20, 5 uL H<sub>2</sub>O) by pipetting six times up and down, followed by 30 minutes incubation at 37°C at 1000  
759 RPM mixing rate. After MinElute clean-up and elution in 21 uL elution buffer, the transposed fragments  
760 were pre-amplified with Nextera primers by mixing 20 uL of transposed sample, 2.5 uL of both forward  
761 and reverse primers (25 uM) and 25 uL of 2x NEBNext Master Mix (program: 72°C for 5 min, 98°C  
762 for 30 sec and 5 cycles of [98°C for 10 sec, 63 °C for 30 sec, 72°C for 1 min] and hold at 4°C). To  
763 determine the required number of additional PCR cycles, a qPCR was performed (see Buenrostro et al.,  
764 2015 for the determination of the number of cycles to be added). The final amplification was done with  
765 the additional number of cycles, samples were cleaned-up by MinElute and libraries were prepped using  
766 the KAPA Library Quantification Kit as previously described (Corces et al., 2017). Samples were  
767 sequenced on a NextSeq500 High Output chip, generating between 41 and 70 million reads per sample.

768 **Data processing:** Adapter sequences were trimmed from the fastq files using fastq-mcf (as part of ea  
769 utils; v1.04.807). Read quality was then checked using FastQC (v0.11.5). Reads were mapped to the  
770 human genome (hg19-GenCode v18) using STAR (v2.5.1) applying the parameters --alignIntronMax 1  
771 and --alignIntronMin 2. Mapped reads were filtered for quality using SAMtools (v1.2) view with  
772 parameter -q4, sorted with SAMtools sort and indexed using SAMtools index. Peaks were called using  
773 MACS2 (v2.1.1) callpeak using the parameters --nomodel and --call-summits on the 8 conditions  
774 separately. A count matrix was generated by using featureCounts (as part of Subread; v1.4.6) of all  
775 separate bam files on the merged peak file (after conversion of the merged peak bed file to a gff format  
776 using a custom script). Normalised bedGraphs were produced by genomeCoverageBed (as part of  
777 bedtools; v2.23.0) using as scaling parameter (-scale) size factors obtained from DEseq2 (v1.18.1).  
778 BedGraphs were converted to bigWigs by the bedtools suite functions bedSort to sort the bedGraphs,  
779 followed by bedGraphToBigWig to create the bigWigs, which were used in IGV for visualisation.

## 780 **scATAC-seq**

781 **Data generation:** scATAC-seq was performed using the Fluidigm C1 system as described before  
782 (Buenrostro et al., 2015). Briefly, cells were trypsinised, spun down (1000 RPM, 5 min), medium was  
783 removed and cells were resuspended in fresh medium and passed through a 40 um filter, counted and  
784 diluted till 200,000 cells per mL. Cells were loaded (using a 40:60 ratio of RGT:cells) on a primed Open  
785 App IFC (10-17 um, the protocol for ATAC-seq from the C1 Script Hub was used). After cell loading,  
786 the plate was visually checked under a microscope and the number of cells in each of the capture

787 chambers was noted. Next, the “Sample prep” was performed on the Fluidigm C1 during which the  
788 cells underwent lysis and ATAC-seq fragments were prepared. In a 96-well plate, the harvested libraries  
789 were amplified in a 25 uL PCR reaction. The PCR products were pooled and purified on a single  
790 MinElute PCR purification column for a final library volume of 15 uL. Quality checks were performed  
791 using the Bioanalyzer high sensitivity chips. Fragments under 150 bp were removed by bead-cleanup  
792 using AMPure XP beads (1.2x bead ratio) (Beckman Coulter). All scATAC-seq libraries were  
793 sequenced on a HiSeq4000 paired-end run, generating a median of 170,769 raw reads per single cell.

794 **Data processing:** The reads from scATAC-seq samples were first cleaned for adapters using fastq-mcf  
795 using fastq-mcf (as part of ea utils; v1.1.2-686). Read quality was then checked using FastQC (v0.11.5).  
796 Paired-end reads were mapped to the human genome (hg19-GenCode v18) using STAR (v2.5.1)  
797 applying the parameters --alignIntronMax 1, --alignIntronMin 2 and --alignMatesGapMax 2000.  
798 Mapped reads were filtered for quality using SAMtools (v1.2) view with parameter -q4, sorted with  
799 SAMtools sort and indexed using SAMtools index. Duplicates were removed using Picard (v1.134)  
800 MarkDuplicates using OPTICAL\_DUPLICATE\_PIXEL\_DISTANCE=2500. To filter out cell of bad  
801 quality, transcription start site aggregation plots were made using a custom script and cell having a low  
802 signal-to-noise profile were removed from further analyses. This lead to a final of 598 good quality  
803 cells over 8 Fluidigm C1 runs. Bam files of good quality single cells were aggregated per condition and  
804 peaks were called on these aggregated samples using MACS2 (v2.1.1) callpeak using the parameters -  
805 -nomodel and --call-summits. The peak files per condition were merged (78,661 peaks in total before  
806 blacklisting) and blacklisted using the blacklisted regions of hg19 listed on  
807 <http://mitra.stanford.edu/kundaje/akundaje/release/blacklists/hg19-human/> (Anshul Kundaje), leading  
808 to a total of 78,262 peaks after blacklisting. This peak file was used, together with the bam files of the  
809 good single cells as, input for cisTopic. To visualise the aggregated cells per sample, normalised  
810 bedGraphs were produced by genomeCoverageBed (as part of bedtools; v2.23.0) using as scaling  
811 parameter (-scale) size factors obtained from DEseq2 (v1.18.1). BedGraphs were converted to bigWigs  
812 by the bedtools suit functions bedSort to sort the bedGraphs, followed by bedGraphToBigWig to create  
813 the bigWigs.

#### 814 **Luciferase assays**

815 The DCT (chr13:95131958-95132420) and EDNRB (chr13:78427800-78428233) regulatory regions  
816 were defined based on the peaks obtained in our scATAC-seq experiment. The regions were scored  
817 with Cluster-Buster (Frith et al., 2003) for the SOX dimer motif (transfac\_pro\_\_MM08838) and the  
818 identified motifs were disrupted by two point mutations (ACAaagnnncctT to ACCAaagnnncctG),  
819 manually changing these nucleotides in the fasta sequences. Similarly, the wild-type regions were  
820 scored for Eboxes (most probably linked to MITF) and these were disrupted by two point mutations  
821 (CANNTG to TANNTA), taking care that no SOX motifs were consequently disrupted. Lastly, we  
822 modified the inner two nucleotides of the Eboxes from the putative MITF Ebox (CACGTG) to the

823 putative Olig Ebox (CAGCTG). The wild-type sequence and the mutated sequences were synthetically  
824 generated, together with specific cloning sites, via gBlocks (IDT). The fragments were cloned into a  
825 pGL4.23[luc2/minP] vector (Promega) using cohesive-end restriction cloning. Clones were checked by  
826 Sanger sequencing for the correct mutation. Luciferase assays were performed three times in triplicate  
827 for each plasmid. Cells seeded at ~80% confluency were transfected with 400 ng of the luciferase  
828 reporter plasmid and 40 ng of Renilla plasmid (Promega) using lipofectamine 2000 (Invitrogen).  
829 Luciferase activity of each variant was measured using the Dual-Luciferase Reporter Assay (Promega)  
830 and was normalised against the Renilla luciferase activity. We performed a two-sided t-test with  
831 unequal variance and calculated the standard deviation.

### 832 **Publicly available data used in this work**

833 Raw fastq files of DNaseI-seq on penis foreskin melanocytes primary cells were downloaded from  
834 NCBI's Gene Expression Omnibus (Edgar et al., 2002) through GEO accession number GSE18927  
835 (GSM774243) and was mapped on the human genome (hg19-Gencode v18) using STAR (v2.5.1).  
836 SOX10 ChIP-seq and MITF ChIP-seq were downloaded as raw fastq files from GEO GSE61965 and  
837 were mapped to the human genome using Bowtie2 (v2.1.0) and peaks were called by MACS2 (v2.1.1).  
838 TFAP2 ChIP-seq data in human primary melanocytes was retrieved from Seberg et al., 2017  
839 (GSE67555). FAIRE-seq, H3K27Ac-seq and RNA-seq data on the melanoma lines (GSE60666) were  
840 processed as mentioned in Verfaillie et al., 2015.

841 For the simulations of single cells from bulk melanoma cell line epigenomes, we used the H3K27Ac  
842 data from Verfaillie et al., 2015 (GEO GSE60666). scATAC-seq data from the hematopoietic system  
843 (Corces et al., 2016), was retrieved from GEO GSE74310; scWGBS data in the hematopoietic system  
844 (Farlik et al., 2016) was obtained from GEO GSE87197; and scTHS-seq and scRNA-seq data from the  
845 human brain (Lake et al., 2017) was downloaded from GEO GSE97942 and GEO GSE97930,  
846 respectively.

### 847 **Data availability**

848 The data generated for this study have been deposited in NCBI's Gene Expression Omnibus and are  
849 accessible through GEO Series accession number GSE114557.

### 850 **Code availability**

851 cisTopic is available as an R package at: <http://github.com/aertslab/cistopic>.

### 852 **Acknowledgements**

853 This work is funded by an ERC Consolidator Grant to S. Aerts (724226\_cis-CONTROL); by the Special  
854 Research Fund (BOF) KU Leuven (grants PF/10/016 to S. Aerts), the Harry J. Lloyd Charitable Trust,  
855 the Foundation Against Cancer (2016-070; to S. Aerts), PhD fellowships from the F.W.O. (L.M.) and  
856 a postdoctoral research fellowship from Kom op tegen Kanker (Stand up to Cancer), the Flemish Cancer

857 Society (J.W.). Computing was performed at the Vlaams Supercomputer Center (VSC). The funders  
858 had no role in study design, data collection and analysis, decision to publish or preparation of the  
859 manuscript. The authors thank Jean-Christophe Marine, Florian Rambow, and Michael Dewaele for  
860 helpful discussions; and Blue Lake and Kun Zhang for the information provided regards the human  
861 brain data. The authors also thank various groups that make curated position weight matrices publicly  
862 available, including T. Hughes (cis-bp), M. Bulyk (Uniprobe), A. Mathelier (Jaspar), V. Makeev  
863 (Hocomoco) and many others.

#### 864 **Competing interest**

865 The authors declare that no competing interests exist.

866



## 867 **References**

- 868 Aibar, S., Bravo González-Blas, C., Moerman, T., Huynh-Thu, V.A., Imrichova, H., Hulselmans, G.,  
869 Rambow, F., Marine, J.C., Geurts, P., Aerts, J., et al. (2017). SCENIC: Single-cell regulatory network  
870 inference and clustering. *Nat. Methods* *14*, 1083–1086.
- 871 Angerer, P., Haghverdi, L., Büttner, M., Theis, F.J., Marr, C., and Buettner, F. (2016). destiny: diffusion  
872 maps for large-scale single-cell data in R. *Bioinformatics* *32*, 1241–1243.
- 873 Angermueller, C., Clark, S.J., Lee, H.J., Macaulay, I.C., Teng, M.J., Hu, T.X., Krueger, F., Smallwood,  
874 S.A., Ponting, C.P., Voet, T., et al. (2016). Parallel single-cell sequencing links transcriptional and  
875 epigenetic heterogeneity. *Nat. Methods* *13*.
- 876 Bernd, A., Ramirez-Bosca, A., Kippenberger, S., Martinez-Liarte, J.H., Holzmann, H., and Solano, F.  
877 (1994). Levels of dopachrome tautomerase in human melanocytes cultured in vitro. *Melanoma Res.* *4*,  
878 287–291.
- 879 Bing, Y.-H., Zhang, G.-J., Sun, L., Chu, C.-P., and Qiu, D.-L. (2015). Dynamic properties of sensory  
880 stimulation evoked responses in mouse cerebellar granule cell layer and molecular layer. *Neurosci. Lett.*  
881 *585*, 114–118.
- 882 Bishop, C.M. (2006). *Pattern recognition and machine learning* (New York: Springer).
- 883 Bittner, M., Meltzer, P., Chen, Y., Jiang, Y., Seftor, E., Hendrix, M., Radmacher, M., Simon, R.,  
884 Yakhini, Z., Ben-Dor, A., et al. (2000). Molecular classification of cutaneous malignant melanoma by  
885 gene expression profiling. *Nature* *406*, 536–540.
- 886 Blei, D.M., Ng, A.Y., and Jordan, M.I. (2003). Latent Dirichlet Allocation. *J. Mach. Learn. Res.* *3*, 993–  
887 1022.
- 888 de Boer, C., and Regev, A. (2017). Deciphering Variance In Epigenomic Regulators By k-mer  
889 Factorization. [Doi.Org 129247–129247](https://doi.org/10.1101/129247).
- 890 Buac, K., Xu, M., Cronin, J., Weeraratna, A.T., Hewitt, S.M., and Pavan, W.J. (2011). NRG1/ERBB3  
891 signaling in melanocyte development and melanoma: inhibition of differentiation and promotion of  
892 proliferation. *Pigment Cell Melanoma Res* *22*, 773–784.
- 893 Buenrostro, J.D., Wu, B., Litzenburger, U.M., Ruff, D., Gonzales, M.L., Snyder, M.P., Chang, H.Y.,  
894 and Greenleaf, W.J. (2015). Single-cell chromatin accessibility reveals principles of regulatory  
895 variation. *Nature* *523*, 486–490.
- 896 Buenrostro, J.D., Corces, M.R., Lareau, C.A., Wu, B., Schep, A.N., Aryee, M.J., Majeti, R., Chang,  
897 H.Y., and Greenleaf, W.J. (2018). Integrated Single-Cell Analysis Maps the Continuous Regulatory  
898 Landscape of Human Hematopoietic Differentiation. *Cell* *173*, 1535-1548.e16.
- 899 Caiazzo, M., Giannelli, S., Valente, P., Lignani, G., Carissimo, A., Sessa, A., Colasante, G.,  
900 Bartolomeo, R., Massimino, L., Ferroni, S., et al. (2015). Direct Conversion of Fibroblasts into  
901 Functional Astrocytes by Defined Transcription Factors. *Stem Cell Rep.* *4*, 25–36.
- 902 Chang, J. (2015). *lda: Collapsed Gibbs Sampling Methods for Topic Models*. R package version 1.2.3,  
903 URL <http://CRAN.R-project.org/package=lda>.
- 904 Chen, G., Zhang, Y., Li, X., Zhao, X., Ye, Q., Lin, Y., Tao, H.W., Rasch, M.J., and Zhang, X. (2017).  
905 Distinct Inhibitory Circuits Orchestrate Cortical beta and gamma Band Oscillations. *Neuron* *96*, 1403-  
906 1418.e6.

- 907 Chiu, T.-P., Yang, L., Zhou, T., Main, B.J., Parker, S.C.J., Nuzhdin, S.V., Tullius, T.D., and Rohs, R.  
908 (2015). GBshape: a genome browser database for DNA shape annotations. *Nucleic Acids Res.* *43*,  
909 D103–D109.
- 910 Corces, M.R., Buenrostro, J.D., Wu, B., Greenside, P.G., Chan, S.M., Koenig, J.L., Snyder, M.P.,  
911 Pritchard, J.K., Kundaje, A., Greenleaf, W.J., et al. (2016). Lineage-specific and single-cell chromatin  
912 accessibility charts human hematopoiesis and leukemia evolution. *Nat. Genet.* *48*, 1193–1203.
- 913 Corces, M.R., Trevino, A.E., Hamilton, E.G., Greenside, P.G., Sinnott-Armstrong, N.A., Vesuna, S.,  
914 Satpathy, A.T., Rubin, A.J., Montine, K.S., Wu, B., et al. (2017). An improved ATAC-seq protocol  
915 reduces background and enables interrogation of frozen tissues. *Nat. Methods* *14*.
- 916 Cusanovich, D.A., Daza, R., Adey, A., Pliner, H.A., Christiansen, L., Gunderson, K.L., Steemers, F.J.,  
917 Trapnell, C., and Shendure, J. (2015). Multiplex single-cell profiling of chromatin accessibility by  
918 combinatorial cellular indexing. *Science* *348*, 910–914.
- 919 Cusanovich, D.A., Reddington, J.P., Garfield, D.A., Daza, R.M., Aghamirzaie, D., Marco-Ferreres, R.,  
920 Pliner, H.A., Christiansen, L., Qiu, X., Steemers, F.J., et al. (2018). The cis-regulatory dynamics of  
921 embryonic development at single-cell resolution. *Nature* *555*, 538–542.
- 922 Deng, H. (2014). Interpreting Tree Ensembles with inTrees. ArXiv14085456 Cs Stat.
- 923 Dynan, W.S., and Tjian, R. (1983). The promoter-specific transcription factor Sp1 binds to upstream  
924 sequences in the SV40 early promoter. *Cell* *35*, 79–87.
- 925 Edgar, R., Domrachev, M., and Lash, A.E. (2002). Gene Expression Omnibus: NCBI gene expression  
926 and hybridization array data repository. *Nucleic Acids Res.* *30*, 207–210.
- 927 Eichhoff, O.M., Zipser, M.C., Xu, M., Weeraratna, A.T., Mihic, D., Dummer, R., and Hoek, K.S.  
928 (2010). The immunohistochemistry of invasive and proliferative phenotype switching in melanoma: a  
929 case report: *Melanoma Res.* *20*, 349–355.
- 930 Farlik, M., Sheffield, N.C., Klughammer, J., Bock, C., and Klughammer, J. (2015). Single-Cell DNA  
931 Methylome Sequencing and Resource Single-Cell DNA Methylome Sequencing and Bioinformatic  
932 Inference of Epigenomic Cell-State Dynamics. 1386–1397.
- 933 Farlik, M., Halbritter, F., Lengauer, T., Frontini, M., Bock, C., Choudry, F.A., Ebert, P., and  
934 Klughammer, J. (2016). DNA Methylation Dynamics of Human Hematopoietic Stem Cell  
935 Differentiation. 808–822.
- 936 Finak, G., Mcdavid, A., Yajima, M., Deng, J., Gersuk, V., Shalek, A.K., Slichter, C.K., Miller, H.W.,  
937 Mcelrath, M.J., Prlic, M., et al. (2015). MAST: a flexible statistical framework for assessing  
938 transcriptional changes and characterizing heterogeneity in single-cell RNA sequencing data. *Genome*  
939 *Biol.* 1–13.
- 940 Flavell, S.W., Kim, T.-K., Gray, J.M., Harmin, D.A., Hemberg, M., Hong, E.J., Markenscoff-  
941 Papadimitriou, E., Bear, D.M., and Greenberg, M.E. (2008). Genome-wide analysis of MEF2  
942 transcriptional program reveals synaptic target genes and neuronal activity-dependent polyadenylation  
943 site selection. *Neuron* *60*, 1022–1038.
- 944 Frith, M.C., Li, M.C., and Weng, Z. (2003). Cluster-Buster: Finding dense clusters of motifs in DNA  
945 sequences. *Nucleic Acids Res.* *31*, 3666–3668.
- 946 Gashler, A., and Sukhatme, V.P. (1995). Early growth response protein 1 (Egr-1): prototype of a zinc-  
947 finger family of transcription factors. *Prog. Nucleic Acid Res. Mol. Biol.* *50*, 191–224.

- 948 Gembarska, A., Luciani, F., Fedele, C., Russell, E.A., Dewaele, M., Villar, S., Zwolinska, A., Haupt,  
949 S., de Lange, J., Yip, D., et al. (2012). MDM4 is a key therapeutic target in cutaneous melanoma. *Nat.*  
950 *Med.* *18*, 1239–1247.
- 951 Graf, S.A., Busch, C., Bosserhoff, A.K., Besch, R., and Berking, C. (2014). SOX10 promotes melanoma  
952 cell invasion by regulating melanoma inhibitory activity. *J. Invest. Dermatol.* *134*, 2212–2220.
- 953 Griffiths, T.L., and Steyvers, M. (2004). Finding scientific topics. *Proc. Natl. Acad. Sci. U. S. A.* *101*  
954 *Suppl*, 5228–5235.
- 955 Gu, Z. (2018). rGREAT: Client for GREAT Analysis. R package version 3.7, URL  
956 <https://github.com/jokergoo/rGREAT>, <http://great.stanford.edu/public/html/>.
- 957 Hainer, S.J., Boskovic, A., Rando, O.J., and Fazio, T.G. (2018). Profiling of pluripotency factors in  
958 individual stem cells and early embryos.
- 959 Harris, M.L., Baxter, L.L., Loftus, S.K., and Pavan, W.J. (2011). Sox proteins in melanocyte  
960 development and melanoma. *23*, 496–513.
- 961 Heinz, S., Benner, C., Spann, N., Bertolino, E., Lin, Y.C., Laslo, P., Cheng, J.X., Murre, C., Singh, H.,  
962 and Glass, C.K. (2010). Simple combinations of lineage-determining transcription factors prime cis-  
963 regulatory elements required for macrophage and B cell identities. *Mol. Cell* *38*, 576–589.
- 964 Herrmann, C., Van De Sande, B., Potier, D., and Aerts, S. (2012). i-cisTarget: An integrative genomics  
965 method for the prediction of regulatory features and cis-regulatory modules. *Nucleic Acids Res.* *40*.
- 966 Hoek, K.S., Schlegel, N.C., Sucker, A., Ugurel, S., Weber, B.L., Katherine, L., Phillips, D.J., and  
967 Schadendorf, D. (2006). Metastatic potential of melanomas defined by specific gene expression profiles  
968 with no BRAF signature.
- 969 Hoek, K.S., Eichhoff, O.M., Schlegel, N.C., Döbbeling, U., Kobert, N., Schaerer, L., Hemmi, S., and  
970 Dummer, R. (2008). In vivo switching of human melanoma cells between proliferative and invasive  
971 states. *Cancer Res.* *68*, 650–656.
- 972 Hou, L., Srivastava, Y., and Jauch, R. (2017). Molecular basis for the genome engagement by Sox  
973 proteins. *Semin. Cell Dev. Biol.* *63*, 2–12.
- 974 Hu, Y., Huang, K., An, Q., Du, G., Hu, G., Xue, J., Zhu, X., Wang, C.-Y., Xue, Z., and Fan, G. (2016).  
975 Simultaneous profiling of transcriptome and DNA methylome from a single cell. *Genome Biol.* *17*, 88–  
976 88.
- 977 Imrichová, H., Hulselmans, G., Kalender Atak, Z., Potier, D., and Aerts, S. (2015). i-cisTarget 2015  
978 update: generalized cis-regulatory enrichment analysis in human, mouse and fly. *Nucleic Acids Res.*  
979 *43*, W57–W64.
- 980 Iozumi, K., Hoganson, G.E., Pennella, R., Everett, M.A., and Fuller, B.B. (1993). Role of Tyrosinase  
981 as the Determinant of Pigmentation in Cultured Human Melanocytes. *J. Invest. Dermatol.* *100*, 806–  
982 811.
- 983 Janky, R., Verfaillie, A., Imrichová, H., van de Sande, B., Standaert, L., Christiaens, V., Hulselmans,  
984 G., Herten, K., Naval Sanchez, M., Potier, D., et al. (2014). iRegulon: From a Gene List to a Gene  
985 Regulatory Network Using Large Motif and Track Collections. *PLoS Comput. Biol.* *10*.
- 986 Ji, Z., Zhou, W., and Ji, H. (2017). Single-cell regulome data analysis by SCRAT. *Bioinformatics* *33*,  
987 2930–2932.

- 988 Johnson, J.L., Georgakilas, G., Petrovic, J., Kurachi, M., Cai, S., Harly, C., Pear, W.S., Bhandoola, A.,  
989 Wherry, E.J., and Vahedi, G. (2018). Lineage-Determining Transcription Factor TCF-1 Initiates the  
990 Epigenetic Identity of T Cells. *Immunity* *48*, 243-257.e10.
- 991 Kaczmarek, L. (2002). New EMBO Member's Review: Matrix metalloproteinases in the adult brain  
992 physiology: a link between c-Fos, AP-1 and remodeling of neuronal connections? *EMBO J.* *21*, 6643–  
993 6648.
- 994 Kang, P., Lee, H.K., Glasgow, S.M., Finley, M., Donti, T., Gaber, Z.B., Graham, B.H., Foster, A.E.,  
995 Novitch, B.G., Gronostajski, R.M., et al. (2012). Sox9 and NFIA Coordinate a Transcriptional  
996 Regulatory Cascade during the Initiation of Gliogenesis. *Neuron* *74*, 79–94.
- 997 Kaplan, N., Moore, I.K., Fondufe-Mittendorf, Y., Gossett, A.J., Tillo, D., Field, Y., LeProust, E.M.,  
998 Hughes, T.R., Lieb, J.D., Widom, J., et al. (2009). The DNA-encoded nucleosome organization of a  
999 eukaryotic genome. *Nature* *458*, 362–366.
- 1000 Kellerer, S. (2006). Replacement of the Sox10 transcription factor by Sox8 reveals incomplete  
1001 functional equivalence. *Development* *133*, 2875–2886.
- 1002 Kondoh, H., and Kamachi, Y. (2010). SOX–partner code for cell specification: Regulatory target  
1003 selection and underlying molecular mechanisms. *Int. J. Biochem. Cell Biol.* *42*, 391–399.
- 1004 Krijthe, J., and van der Maaten, L. (2017). Package ‘Rtsne’. R package version 0.13, URL  
1005 <https://github.com/jkrijthe/Rtsne>.
- 1006 Kuang, D., Brantingham, P.J., and Bertozzi, A.L. (2017). Crime topic modeling. *Crime Sci.* *6*.
- 1007 Kulakovskiy, I.V., Vorontsov, I.E., Yevshin, I.S., Sharipov, R.N., Fedorova, A.D., Rumynskiy, E.I.,  
1008 Medvedeva, Y.A., Magana-Mora, A., Bajic, V.B., Papatsenko, D.A., et al. (2018). HOCOMOCO:  
1009 towards a complete collection of transcription factor binding models for human and mouse via large-  
1010 scale ChIP-Seq analysis. *Nucleic Acids Res.* *46*, D252–D259.
- 1011 Kursa, M.B., and Rudnicki, W.R. (2010). Feature Selection with the Boruta Package. *J. Stat. Softw.* *36*.
- 1012 Lake, B.B., Ai, R., Kaeser, G.E., Salathia, N.S., Yung, Y.C., Liu, R., Wildberg, A., Gao, D., Fung, H.-  
1013 L., Chen, S., et al. (2016). Neuronal subtypes and diversity revealed by single-nucleus RNA sequencing  
1014 of the human brain. *Science* *352*, 1586–1590.
- 1015 Lake, B.B., Chen, S., Sos, B.C., Fan, J., Kaeser, G.E., Yung, Y.C., Duong, T.E., Gao, D., Chun, J.,  
1016 Kharchenko, P.V., et al. (2017). Integrative single-cell analysis of transcriptional and epigenetic states  
1017 in the human adult brain. *Nat. Biotechnol.* *36*, 70–80.
- 1018 Lareau, C.A., Ulirsch, J.C., Bao, E.L., Ludwig, L.S., Guo, M.H., Benner, C., Satpathy, A.T., Salem, R.,  
1019 Hirschhorn, J.N., Finucane, H.K., et al. (2018). Interrogation of human hematopoiesis at single-cell and  
1020 single-variant resolution.
- 1021 Laurette, P., Strub, T., Koludrovic, D., Keime, C., Le Gras, S., Seberg, H., Van Otterloo, E., Imrichova,  
1022 H., Siddaway, R., Aerts, S., et al. (2015). Transcription factor MITF and remodeler BRG1 define  
1023 chromatin organisation at regulatory elements in melanoma cells. *ELife* *2015*, 1–40.
- 1024 Li, X.Y., Mantovani, R., Hooft van Huijsduijnen, R., Andre, I., Benoist, C., and Mathis, D. (1992).  
1025 Evolutionary variation of the CCAAT-binding transcription factor NF-Y [published erratum appears in  
1026 *Nucleic Acids Res* 1992 Apr 11;20(7):1841]. *Nucleic Acids Res* *20*, 1087–1091.
- 1027 Liaw, A., and Wiener, M. (2001). Classification and Regression by RandomForest.

- 1028 Liu, L., Liu, C., Wu, L., Quintero, A., Yuan, Y., Wang, M., Cheng, M., Xu, L., Dong, G., Li, R., et al.  
1029 (2018). Deconvolution of single-cell multi-omics layers reveals regulatory heterogeneity.
- 1030 Mazzoni, E.O., Mahony, S., Iacovino, M., Morrison, C.A., Mountoufaris, G., Closser, M., Whyte,  
1031 W.A., Young, R.A., Kyba, M., Gifford, D.K., et al. (2011). Embryonic stem cell-based mapping of  
1032 developmental transcriptional programs. *Nat. Methods* 8, 1056–1058.
- 1033 McLean, C.Y., Bristor, D., Hiller, M., Clarke, S.L., Schaar, B.T., Lowe, C.B., Wenger, A.M., and  
1034 Bejerano, G. (2010). GREAT improves functional interpretation of cis-regulatory regions. *Nat.*  
1035 *Biotechnol.* 28, 495–501.
- 1036 Mezger, A., Klemm, S., Mann, I., Brower, K., Mir, A., Bostick, M., Farmer, A., Fordyce, P., Linnarsson,  
1037 S., and Greenleaf, W. (2018). High-throughput chromatin accessibility profiling at single-cell  
1038 resolution.
- 1039 Miyata, T., Maeda, T., and Lee, J.E. (1999). NeuroD is required for differentiation of the granule cells  
1040 in the cerebellum and hippocampus. *Genes Dev.* 13, 1647–1652.
- 1041 Murisier, F., Guichard, S., and Beermann, F. (2007). The tyrosinase enhancer is activated by Sox10 and  
1042 Mitf in mouse melanocytes. *Pigment Cell Res.* 20, 173–184.
- 1043 O'Donovan, K.J., and Baraban, J.M. (1999). Major Egr3 isoforms are generated via alternate translation  
1044 start sites and differ in their abilities to activate transcription. *Mol. Cell. Biol.* 19, 4711–4718.
- 1045 Petrova, R., Garcia, A.D.R., and Joyner, A.L. (2013). Titration of GLI3 Repressor Activity by Sonic  
1046 Hedgehog Signaling Is Critical for Maintaining Multiple Adult Neural Stem Cell and Astrocyte  
1047 Functions. *J. Neurosci.* 33, 17490–17505.
- 1048 Pliner, H.A., Packer, J., McFaline-Figueroa, J., Cusanovich, D., Daza, R., Srivatsan, S., Qiu, X.,  
1049 Jackson, D., Minkina, A., Adey, A., et al. (2017). Chromatin Accessibility Dynamics of Myogenesis at  
1050 Single Cell Resolution. *BioRxiv* 155473–155473.
- 1051 Portales-Casamar, E., Thongjuea, S., Kwon, A.T., Arenillas, D., Zhao, X., Valen, E., Yusuf, D.,  
1052 Lenhard, B., Wasserman, W.W., and Sandelin, A. (2010). JASPAR 2010: the greatly expanded open-  
1053 access database of transcription factor binding profiles. *Nucleic Acids Res.* 38, D105–D110.
- 1054 Pott, S. (2016). Simultaneous measurement of chromatin accessibility, DNA methylation, and  
1055 nucleosome phasing in single cells. *BioRxiv* 061739–061739.
- 1056 Potterf, S.B., Mollaaghababa, R., Hou, L., Southard-smith, E.M., Hornyak, T.J., Arnheiter, H., and  
1057 Pavan, W.J. (2001). Analysis of SOX10 Function in Neural Crest-Derived Melanocyte Development :  
1058 SOX10-Dependent Transcriptional Control of Dopachrome Tautomerase. 257, 245–257.
- 1059 Prasad, M.K., Reed, X., Gorkin, D.U., Cronin, J.C., Mcadow, A.R., Chain, K., Hodonsky, C.J., Jones,  
1060 E.A., Svaren, J., Antonellis, A., et al. (2011). SOX10 directly modulates ERBB3 transcription via an  
1061 intronic neural crest enhancer.
- 1062 Preissl, S., Fang, R., Huang, H., Zhao, Y., Raviram, R., Gorkin, D.U., Zhang, Y., Sos, B.C., Afzal, V.,  
1063 Dickel, D.E., et al. (2018). Single-nucleus analysis of accessible chromatin in developing mouse  
1064 forebrain reveals cell-type-specific transcriptional regulation. *Nat. Neurosci.*
- 1065 Rasiwasia, N., and Vasconcelos, N. (2013). Latent Dirichlet Allocation Models for Image  
1066 Classification. *IEEE Trans. Pattern Anal. Mach. Intell.* 35, 2665–2679.

- 1067 Restivo, G., Diener, J., Cheng, P.F., Kiowski, G., Bonalli, M., Biedermann, T., Reichmann, E.,  
1068 Levesque, M.P., Dummer, R., and Sommer, L. (2017). Low Neurotrophin receptor CD271 regulates  
1069 phenotype switching in Melanoma. *Nat. Commun.* 8.
- 1070 Schep, A.N., Wu, B., Buenrostro, J.D., and Greenleaf, W.J. (2017). chromVAR: inferring transcription-  
1071 factor-associated accessibility from single-cell epigenomic data. *Nat. Methods* 14.
- 1072 Scholl, F. a, Kamarashev, J., and Murmann, O.V. (2001). PAX3 Is Expressed in Human Melanomas  
1073 and Contributes to Tumor Cell Survival PAX3 Is Expressed in Human Melanomas and Contributes to  
1074 Tumor Cell Survival 1. 823–826.
- 1075 Seberg, H.E., Van Otterloo, E., Loftus, S.K., Liu, H., Bonde, G., Sompallae, R., Gildea, D.E., Santana,  
1076 J.F., Manak, J.R., Pavan, W.J., et al. (2017). TFAP2 paralogs regulate melanocyte differentiation in  
1077 parallel with MITF. *PLOS Genet.* 13, e1006636.
- 1078 Shaffer, S.M., Dunagin, M.C., Torborg, S.R., Torre, E.A., Emert, B., Krepler, C., Beqiri, M., Sproesser,  
1079 K., Brafford, P.A., Xiao, M., et al. (2017). Rare cell variability and drug-induced reprogramming as a  
1080 mode of cancer drug resistance. *Nature* 546, 431–435.
- 1081 Shakhova, O., Zingg, D., Schaefer, S.M., Hari, L., Civenni, G., Blunski, J., Claudinot, S., Okoniewski,  
1082 M., Beermann, F., Mihic-Probst, D., et al. (2012). Sox10 promotes the formation and maintenance of  
1083 giant congenital naevi and melanoma. *Nat. Cell Biol.* 14, 882–890.
- 1084 Stolt, C.C., Rehberg, S., Ader, M., Lommes, P., Riethmacher, D., Schachner, M., Bartsch, U., and  
1085 Wegner, M. (2002). Terminal differentiation of myelin-forming oligodendrocytes depends on the  
1086 transcription factor Sox10. 165–170.
- 1087 Sun, C., Wang, L., Huang, S., Heynen, G.J.J.E., Prahallad, A., Robert, C., Haanen, J., Blank, C.,  
1088 Wesseling, J., Willems, S.M., et al. (2014). Reversible and adaptive resistance to BRAF(V600E)  
1089 inhibition in melanoma. *Nature* 508, 118–122.
- 1090 Sun, W., Cornwell, A., Li, J., Peng, S., Osorio, M.J., Aalling, N., Wang, S., Benraiss, A., Lou, N.,  
1091 Goldman, S.A., et al. (2017). SOX9 Is an Astrocyte-Specific Nuclear Marker in the Adult Brain Outside  
1092 the Neurogenic Regions. *J. Neurosci.* 37, 4493–4507.
- 1093 Thomas-Chollier, M., Hufton, A., Heinig, M., O’Keeffe, S., Masri, N.E., Roider, H.G., Manke, T., and  
1094 Vingron, M. (2011). Transcription factor binding predictions using TRAP for the analysis of ChIP-seq  
1095 data and regulatory SNPs. *Nat. Protoc.* 6, 1860–1869.
- 1096 Thomas-Chollier, M., Herrmann, C., Defrance, M., Sand, O., Thieffry, D., and van Helden, J. (2012).  
1097 RSAT peak-motifs: motif analysis in full-size ChIP-seq datasets. *Nucleic Acids Res.* 40, e31–e31.
- 1098 Turnescu, T., Arter, J., Reiprich, S., Tamm, E.R., Waisman, A., and Wegner, M. (2018). Sox8 and  
1099 Sox10 jointly maintain myelin gene expression in oligodendrocytes. *Glia* 66, 279–294.
- 1100 Verfaillie, A., Imrichova, H., Atak, Z.K., Dewaele, M., Rambow, F., Hulselmans, G., Christiaens, V.,  
1101 Svetlichnyy, D., Luciani, F., Van den Mooter, L., et al. (2015). Decoding the regulatory landscape of  
1102 melanoma reveals TEADS as regulators of the invasive cell state. *Nat. Commun.* 6, 6683–6683.
- 1103 Wegner, M., and Stolt, C.C. (2005). From stem cells to neurons and glia: a Soxist’s view of neural  
1104 development. *Trends Neurosci.* 28, 583–588.
- 1105 Weirauch, M.T., Yang, A., Albu, M., Cote, A.G., Montenegro-Montero, A., Drewe, P., Najafabadi,  
1106 H.S., Lambert, S.A., Mann, I., Cook, K., et al. (2014). Determination and inference of eukaryotic  
1107 transcription factor sequence specificity. *Cell* 158, 1431–1443.

- 1108 Wilczynska, K.M., Singh, S.K., Adams, B., Bryan, L., Rao, R.R., Valerie, K., Wright, S., Griswold-  
1109 Prenner, I., and Kordula, T. (2009). Nuclear Factor I Isoforms Regulate Gene Expression During the  
1110 Differentiation of Human Neural Progenitors to Astrocytes. *Stem Cells* 27, 1173–1181.
- 1111 Wilson, M., and Koopman, P. (2002). Matching SOX: partner proteins and co-factors of the SOX family  
1112 of transcriptional regulators. *Curr. Opin. Genet. Dev.* 12, 441–446.
- 1113 Wouters, J., Stas, M., Govaere, O., Barrette, K., Dudek, A., Vankelecom, H., Haydu, L.E., Thompson,  
1114 J.F., Scolyer, R.A., and van den Oord, J.J. (2014). A novel hypoxia-associated subset of  
1115 FN1highMITFlow melanoma cells: identification, characterization, and prognostic value. *Mod. Pathol.*  
1116 27, 1088–1100.
- 1117 Wright, E.M., Snopek, B., and Koopman, P. (1993). Seven new members of the Sox gene during mouse  
1118 development family expressed during mouse development. *Nucl. Acids Res.* 21, 744–744.
- 1119 Yu, G., Wang, L.-G., and He, Q.-Y. (2015). ChIPseeker: an R/Bioconductor package for ChIP peak  
1120 annotation, comparison and visualization. *Bioinformatics* 31, 2382–2383.
- 1121 Yu, Y., Chen, Y., Kim, B., Wang, H., Zhao, C., He, X., Liu, L., Liu, W., Wu, L.M.N., Mao, M., et al.  
1122 (2013). Olig2 targets chromatin remodelers to enhancers to initiate oligodendrocyte differentiation. *Cell*  
1123 152, 248–261.
- 1124 Zamanighomi, M., Lin, Z., Daley, T., Chen, X., Duren, Z., Schep, A., Greenleaf, W.J., and Wong, W.H.  
1125 (2018). Unsupervised clustering and epigenetic classification of single cells. *Nat. Commun.* 9.
- 1126 Zhou, Q., and Anderson, D.J. (2002). The bHLH Transcription Factors OLIG2 and OLIG1 Couple  
1127 Neuronal and Glial Subtype Specification. *Cell* 109, 61–73.
- 1128
- 1129

1130 **Supplementary Figures**

1131 **Fig S1:** cisTopic on simulated single-cell epigenomes from 14 bulk H3K27Ac profiles from different  
1132 melanoma cell lines using medium-high coverage (8,980-19,860 reads per cell).

1133 **Fig S2:** cisTopic detects rare subpopulations with higher accuracy and precision than other methods,  
1134 namely LSI and chromVAR.

1135 **Fig S3:** cisTopic reveals differentiation dynamics in the hematopoietic system and oncogenesis.

1136 **Fig S4:** cisTopic reconstructs a differentiation hierarchy in the hematopoietic system from scWGBS  
1137 data.

1138 **Fig S5:** cisTopic model selection in the human brain data set.

1139 **Fig S6:** cisTopic on the human brain.

1140 **Fig S7:** Summarised cisTopic results for Lake et al. (2017).

1141 **Fig S8:** Accessibility profiles of the cerebellum (CBL), visual cortex (BA17) and frontal cortex (BA9)  
1142 in the vicinity of *NEURODI*.

1143 **Fig S9:** Enrichment of SCENIC regulons within topics in the human brain.

1144 **Fig S10:** Correlation between single-cell and bulk ATAC-seq.

1145 **Fig S11:** Loss of accessibility during the EMT-like transition at known SOX10-bound and -activated  
1146 melanocyte-like regulatory regions and gain of accessibility at mesenchymal-like regions.

1147 **Fig S12:** cisTopic identifies 15 regulatory topics involved in melanoma phenotype switching.

1148 **Fig S13:** Topics identified by cisTopic on melanoma scATAC-seq data.

1149 **Fig S14:** Chromatin accessibility dynamics per regulatory topic.

1150 **Fig S15:** Validation of melanocyte-like and invasive topics using ChIP-seq.

1151 **Fig S16:** General and cell-line specific SOX10 regulatory topics govern the melanocyte-like state.

1152 **Fig S17:** Melanoma SOX10 enhancers are accessible in melanocytes.

1153 **Fig S18:** DNA shape features profiles for the astrocyte, oligodendrocyte and melanoma SOXE  
1154 cistromes.

1155 **Fig S19:** TFAP2A and MITF ChIP-seq peaks overlap specifically with melanoma SOX cistrome  
1156 regions.



1157 **Fig S20:** AP-1 and TFAP2 members are uniquely expressed in melanoma as compared to  
1158 oligodendrocytes and astrocytes.

1159 **Fig S21:** Correlation heatmap between the DNA shape features measurements of the SOXE cistromes.

1160 **Fig S22:** Comparison of astrocyte specific SOXE regions with melanoma and oligodendrocytes SOXE  
1161 specific regions, respectively.

1162 **Fig S23:** Mutating MITF motifs in a melanoma-specific SOX10 enhancer destroys its activity.

### 1163 **Supplementary Tables**

1164 **Table S1:** Comparison of current experimental protocols for performing single-cell epigenomics  
1165 assays.

1166 **Table S2:** Comparison between current bioinformatics methods for analysing single-cell ATAC-seq  
1167 data.
